## 25 **Summary (for the online JCB table of contents and alerts)**

26 We show that auto-inhibition regulates the binding between microtubule nucleating complexes  
27 and proteins that tether them to sites of microtubule nucleation. Failure to properly regulate  
28 this binding can lead to ectopic cytosolic microtubule nucleation and major defects during cell  
29 division.

30

## 31 **Abstract**

32  $\gamma$ -tubulin ring complexes ( $\gamma$ -TuRCs) nucleate microtubules. They are recruited to centrosomes  
33 in dividing cells via binding to N-terminal CM1 domains within  $\gamma$ -TuRC-tethering proteins,  
34 including *Drosophila* Cnn. Binding promotes microtubule nucleation and is restricted to  
35 centrosomes in dividing cells, but the mechanism regulating binding remains unknown. Here  
36 we identify an extreme N-terminal “CM1 auto-inhibition” (CAI) domain found specifically within  
37 the centrosomal isoform of Cnn (Cnn-C) that inhibits  $\gamma$ -TuRC binding. Robust binding occurs  
38 after removal of the CAI domain or with the addition of phospho-mimetic mutations, suggesting  
39 that phosphorylation helps relieve inhibition. We show that regulation of Cnn binding to  $\gamma$ -  
40 TuRCs is isoform-specific and that mis-regulation of binding can result in ectopic cytosolic  
41 microtubules and major defects during cell division. We also find that human CDK5RAP2 is  
42 auto-inhibited from binding  $\gamma$ -TuRCs, suggesting conservation across species. Overall, our  
43 results shed light on how and why CM1 domain binding to  $\gamma$ -TuRCs is regulated.

## 44 Introduction

45 Microtubules are polarised polymers of tubulin that are organised into specialised arrays  
46 crucial for cell function, such as the mitotic spindle. Correct array assembly relies in part on  
47 the spatiotemporal regulation of microtubule formation, and this is achieved by restricting  
48 microtubule formation and organisation to specific microtubule organising centres (MTOCs),  
49 such as the centrosome during mitosis (Tillery et al., 2018; Sanchez and Feldman, 2016; Petry  
50 and Vale, 2015).

51

52 The common link between most MTOCs is the presence of multi-protein  $\gamma$ -tubulin ring  
53 complexes ( $\gamma$ -TuRCs), which template and catalyse the kinetically unfavourable process of  
54 microtubule nucleation (Kollman et al., 2011; Teixidó-Travesa et al., 2012; Lin et al., 2014a;  
55 Tovey and Conduit, 2018; Farache et al., 2018).  $\gamma$ -TuRCs are recruited to MTOCs by  $\gamma$ -TuRC-  
56 tethering proteins that directly link  $\gamma$ -TuRCs to the MTOC.  $\gamma$ -TuRCs contain 14  $\gamma$ -tubulin  
57 molecules held in a single-turn helical conformation by laterally associating  $\gamma$ -tubulin complex  
58 proteins (GCPs) that bind directly to  $\alpha/\beta$ -tubulin dimers to promote new microtubule assembly.  
59  $\gamma$ -TuRCs have a low activity within the cytosol but are thought to be “activated” after  
60 recruitment to MTOCs. In this model, the controlled recruitment and activation of  $\gamma$ -TuRCs  
61 enables the spatiotemporal control of microtubule nucleation and array formation. Consistent  
62 with this model, recent structural studies have shown that  $\gamma$ -TuRCs purified from the cytosol  
63 of HeLa cells and *Xenopus* eggs are in a semi-open conformation, in which the  $\gamma$ -tubulin  
64 molecules do not perfectly match the geometry of a 13 protofilament microtubule (Consolati  
65 et al., 2020; Liu et al., 2019; Wieczorek et al., 2019). A conformational change into a fully  
66 closed ring that matches the geometry of a microtubule is expected to increase the nucleation  
67 capacity of the  $\gamma$ -TuRC. This agrees with studies in budding yeast, where there are  
68 conformational differences between  $\gamma$ -TuRC-like structures formed *in vitro* and  $\gamma$ -TuRCs  
69 bound to microtubules *in vivo*, and where artificial “closure” of  $\gamma$ -TuRCs increases microtubule  
70 nucleation capacity (Kollman et al., 2015).

71

72 How activation via an open-to-closed conformation change occurs is currently unclear, but  
73 various factors have been reported to increase nucleation capacity.  $\gamma$ -TuRCs purified from  
74 *Xenopus* egg extract nucleate much more efficiently after the addition of the TOG domain  
75 protein XMAP215 (Thawani et al., 2020). TOG domain family members mediate  $\alpha/\beta$ -tubulin  
76 addition via their TOG domains (Nithianantham et al., 2018), bind directly to  $\gamma$ -tubulin, and  
77 function in microtubule nucleation *in vitro* and *in vivo* (Wieczorek et al., 2015; Roostalu et al.,  
78 2015; Thawani et al., 2018; Flor-Parra et al., 2018; Gunzelmann et al., 2018). Single molecule

79 experiments combined with modelling suggest that XMAP215 indirectly promotes the open-  
80 to-closed conformation change of purified  $\gamma$ -TuRCs by increasing the chance of protofilament  
81 formation, as lateral contacts between protofilaments should promote  $\gamma$ -TuRC closure  
82 (Thawani et al., 2020). While this is an attractive model, evidence suggests that activation can  
83 occur in different ways and may be context specific. Phosphorylation of  $\gamma$ -TuRCs by Aurora A  
84 around mitotic chromatin increases  $\gamma$ -TuRC activity (Pinyol et al., 2013; Scrofani et al., 2015),  
85 as does addition of NME7 kinase *in vitro* (Liu et al., 2014).  $\gamma$ -TuRC activity is also increased  
86 after binding of the Augmin complex (Tariq et al., 2020), which tethers  $\gamma$ -TuRCs to other  
87 microtubules.

88

89 Another well-documented potential  $\gamma$ -TuRC activator is the Centrosomin Motif 1 (CM1)  
90 domain, which is conserved in  $\gamma$ -TuRC-tethering proteins across Eukaryotes (Sawin et al.,  
91 2004; Zhang and Megraw, 2007; Lin et al., 2014b). Addition of protein fragments containing  
92 the CM1 domain increase the nucleation capacity of  $\gamma$ -TuRCs purified from human cells (Choi  
93 et al., 2010; Muroyama et al., 2016), although the degree of this activity change was much  
94 lower or absent when using  $\gamma$ -TuRCs purified from *Xenopus* eggs (Liu et al., 2019; Thawani  
95 et al., 2020). Expression of CM1 domain fragments within human cells leads to the ectopic  
96 nucleation of microtubules throughout the cytosol, and this is dependent on CM1 binding to  $\gamma$ -  
97 TuRCs (Choi et al., 2010; Hanafusa et al., 2015; Cota et al., 2017). In fission yeast, expression  
98 of CM1 domain fragments also results in cytosolic microtubule nucleation (Lynch et al., 2014),  
99 and in *Xenopus* addition of CM1-domain fragments increases microtubule aster formation  
100 within egg extracts supplemented with activated Ran (Liu et al., 2019). In budding yeast, CM1  
101 domain binding appears to move  $\gamma$ -tubulin molecules into a better position for nucleation (Brilot  
102 et al., 2019). While large global structural changes were not observed in mammalian  $\gamma$ -TuRCs  
103 bound by the CM1 domain (Liu et al., 2019; Wieczorek et al., 2019), local structural changes  
104 can be observed, suggesting that more global changes could in theory occur with a higher  
105 stoichiometry of binding (Brilot et al., 2019).

106

107 Given that CM1-domain binding leads to microtubule nucleation, binding is likely  
108 spatiotemporally controlled, particularly during cell division. This idea is consistent with results  
109 from numerous mass spectrometry experiments showing that  $\gamma$ -TuRCs do not readily  
110 associate with CM1-domain proteins within the cytosol (Oegema et al., 1999; Choi et al., 2010;  
111 Hutchins et al., 2010; Teixidó-Travesa et al., 2012; Thawani et al., 2018; Liu et al., 2019;  
112 Wieczorek et al., 2019; Consolati et al., 2020). Binding of the human and *C. elegans* CM1  
113 domain proteins, CDK5RAP2 and SPD-5, to  $\gamma$ -TuRCs involves phosphorylation (Hanafusa et



114 al., 2015; Ohta et al., 2021), which can be a means to spatiotemporally control binding.  
115 Nevertheless, whether phosphorylation directly promotes binding to  $\gamma$ -TuRCs or regulates  
116 binding in a different way remains unclear.

117

118 *Drosophila* Centrosomin (Cnn) is the only reported CM1-domain protein in *Drosophila* but is a  
119 multi-isoform gene with all isoforms containing the CM1 domain (Eisman et al., 2009). The  
120 centrosomal isoform (Cnn-C) has a dual role, both in recruiting  $\gamma$ -TuRCs to centrosomes  
121 (Zhang and Megraw, 2007; Conduit et al., 2014b) and in forming a centrosome-scaffold that  
122 supports mitotic pericentriolar material assembly (Conduit et al., 2014a; Feng et al., 2017).  
123 Phosphorylation of a central Phospho-regulated multimerisation (PReM) domain specifically  
124 at centrosomes drives the oligomerisation of Cnn-C molecules into a scaffold-like structure  
125 that helps recruit other centrosomal proteins (Conduit et al., 2014a; Feng et al., 2017). Testes-  
126 specific Cnn-T isoforms have mitochondrial localisation domains instead of the PReM and  
127 CM2 domains and recruits  $\gamma$ -TuRCs to mitochondria in sperm cells (Chen et al., 2017). Cnn-  
128 C and Cnn-T also vary in their extreme N-terminal regions, upstream of the CM1 domain, with  
129 Cnn-C containing a longer sequence.

130

131 Here, we show that the longer extreme N-terminal region of Cnn-C inhibits binding to  $\gamma$ -TuRCs  
132 and therefore name this region the CM1 auto-inhibition (CAI) domain. Removal of the CAI  
133 domain leads to robust binding, similar to the robust binding observed for the N-terminal region  
134 of Cnn-T. We identify two putative phosphorylation sites, one in the CAI domain (T<sup>27</sup>) and one  
135 downstream of the CM1 domain (S<sup>186</sup>), that promote binding to  $\gamma$ -TuRCs when phospho-  
136 mimicked, suggesting that phosphorylation relieves CAI domain auto-inhibition. We show that  
137 auto-inhibition is important, as expressing a form of Cnn that binds to cytosolic  $\gamma$ -TuRCs leads  
138 to cytosolic microtubule nucleation and major defects during cell division. We further show  
139 that human CDK5RAP2 is inhibited from binding  $\gamma$ -TuRCs in the cytosol by a region  
140 downstream of the CM1 domain, showing that auto-inhibition of binding is conserved feature  
141 of CM1 domain proteins.

## 142 Results

### 143 The extreme N-terminal region of Cnn-C is inhibitory for $\gamma$ -TuRC binding

144 We previously published evidence that different isoforms of Cnn bind  $\gamma$ -TuRCs with different  
145 affinities (Tovey et al., 2018). We found that bacterially purified MBP-tagged N-terminal  
146 fragments of Cnn-T (MBP-Cnn-T-N) could immunoprecipitate cytosolic  $\gamma$ -tubulin with a much  
147 higher affinity than the equivalent fragments of Cnn-C (MBP-Cnn-C-N). Both isoforms share  
148 a short sequence just proximal to the CM1 domain (residues 78-97 in Cnn-C), but differ in  
149 their extreme N-terminal region, which is 77 and 19 residues in Cnn-C and Cnn-T, respectively  
150 (Figure 1A). We had hypothesised that the larger extreme N-terminal region of Cnn-C may  
151 auto-inhibit the CM1 domain, restricting its ability to bind  $\gamma$ -TuRCs. To address this directly,  
152 and to confirm the *in vitro* results, we developed an *in vivo* assay where  $\gamma$ -TuRC recruitment  
153 to different types of Cnn “scaffolds” formed within eggs could be monitored. To form scaffolds  
154 within eggs we injected *in vitro*-generated mRNA encoding Cnn-C with phospho-mimetic  
155 mutations within the PReM domain (Cnn-C-PReM<sup>m</sup>) (Figure 1B). The mRNA is translated into  
156 protein within the egg and the phospho-mimetic mutations cause the Cnn molecules to  
157 oligomerise into centrosome-like scaffolds throughout the cytosol (Conduit et al., 2014a)  
158 (Figure 1C-F; Figure S1). To investigate how binding between Cnn and  $\gamma$ -TuRCs is regulated,  
159 we modified the N-terminal region of Cnn-C-PReM<sup>m</sup> (Figure 1B) and measured how efficiently  
160 fluorescently-tagged  $\gamma$ -TuRC proteins could be recruited to the scaffolds.

161

162 We first compared the recruitment of endogenously tagged  $\gamma$ -tubulin37C-mCherry to GFP-  
163 tagged scaffolds formed from unmodified Cnn-C-PReM<sup>m</sup> with recruitment to scaffolds where  
164 the extreme N-terminal region (dark blue in Figure 1A,B) was either exchanged with the  
165 extreme N-terminal region of Cnn-T (red in Figure 1A,B) (Cnn-T-PReM<sup>m</sup>) or was removed  
166 (Cnn-C $\Delta$ 1-77-PReM<sup>m</sup>). We also tested scaffolds in which all N-terminal amino acids up until the  
167 start of the CM1 domain were removed (Cnn-C $\Delta$ 1-97-PReM<sup>m</sup>). For simplicity we refer to these  
168 as Cnn-C, Cnn-T, Cnn-C $\Delta$ 1-77, and Cnn-C $\Delta$ 1-97 scaffolds, respectively, regardless of the  
169 fluorescent tag used. Initial observations suggested that  $\gamma$ -tubulin associated much more  
170 readily with Cnn-T and Cnn-C $\Delta$ 1-77 scaffolds than with Cnn-C or Cnn-C $\Delta$ 1-97 scaffolds (Figure  
171 1C-F). This was clear after plotting the GFP (Cnn) and mCherry ( $\gamma$ -tubulin) fluorescence  
172 values for individual scaffolds from multiple embryos per condition (Figure 1G). To quantify  $\gamma$ -  
173 tubulin recruitment we performed linear regression for each egg separately and plotted the  
174 slope of these lines (S values, in arbitrary units). The mean S value provides an estimate for  
175 the relative binding affinity between the different forms of Cnn and  $\gamma$ -tubulin complexes (Figure  
176 1H). The mean S values for Cnn-T scaffolds (7.81) and Cnn-C $\Delta$ 1-77 scaffolds (5.01) were ~13-

177 fold and 9-fold higher, respectively, than the mean S value for Cnn-C scaffolds (0.57).  
178 Consistent with this, MBP-tagged N-terminal fragments of Cnn-T (MBP-Cnn-T-N) and Cnn-  
179 C<sup>Δ1-77</sup> (MBP-Cnn-C-N<sup>Δ1-77</sup>) both co-immunoprecipitated more  $\gamma$ -tubulin from embryo extracts  
180 than N-terminal fragments of Cnn-C (MBP-Cnn-C-N) (Figure 1I,J). Thus, the extreme N-  
181 terminal region of Cnn-C (blue in Figure 1A,B) is inhibitory for binding to  $\gamma$ -tubulin complexes.

182

183 The ability of Cnn-C<sup>Δ1-77</sup> to bind  $\gamma$ -tubulin complexes appeared to be dependent on the amino  
184 acids just upstream of the CM1 domain (aa78-97), which are shared with Cnn-T (Figure 1A),  
185 as the mean S value for Cnn-C<sup>Δ1-97</sup> scaffolds (0.36) was not significantly different from the  
186 mean S value for Cnn-C scaffolds (0.57) (Figure 1H). This is consistent with recent  
187 observations in *S. cerevisiae*, showing that the equivalent amino acids within the CM1 domain  
188 protein SPC110 make close contacts with SPC98<sup>GCP3</sup> (Brilot et al., 2019).

189

190 Cnn-T and Cnn-C<sup>Δ1-77</sup> scaffolds also recruited the  $\gamma$ -TuRC-specific component Grip75<sup>GCP4</sup>  
191 better than Cnn-C scaffolds (Figure 2A-E). Similar to the recruitment of  $\gamma$ -tubulin, the mean S  
192 values for Cnn-T (3.8) and Cnn-C<sup>Δ1-77</sup> (3.1) scaffolds were 10.3-fold and 8.4-fold higher,  
193 respectively, than the S value for Cnn-C (0.37) scaffolds (Figure 2E). Moreover, a combination  
194 of western blotting and mass spectrometry showed that bacterially purified MBP-Cnn-T-N  
195 fragments could co-immunoprecipitate numerous other  $\gamma$ -TuRC components (Figure S2).

196

197 The data collectively show that the N-terminus of Cnn-T binds robustly to  $\gamma$ -TuRCs, while the  
198 extreme N-terminal region of Cnn-C (aa1-77) inhibits binding to  $\gamma$ -TuRCs. We therefore name  
199 this region the “CM1 auto-inhibition” (CAI) domain.

200

## 201 **$\gamma$ -TuRCs recruited by Cnn scaffolds appear to be functional and can generate dynamic** 202 **microtubules**

203 We next compared the ability of different scaffold types to organise microtubules. We imaged  
204 GFP-tagged Cnn-C (low  $\gamma$ -TuRC binding), Cnn-T, or Cnn-C<sup>Δ1-77</sup> (high  $\gamma$ -TuRC binding)  
205 scaffolds within eggs expressing the microtubule binding protein Jupiter-mCherry (Figure 3A-  
206 C) and performed a blind analysis to categorise eggs into those containing scaffolds that  
207 organised strong, weak, or no microtubule asters (Figure 3D). We also included a “tubulin  
208 overlay” category, where the Jupiter-mCherry signal did not extend beyond the GFP scaffold  
209 signal. The results show that Cnn-T and Cnn-C<sup>Δ1-77</sup> scaffolds were much more likely to  
210 organise microtubule asters than Cnn-C scaffolds (Figure 3D). This correlates with the  
211 increased recruitment of  $\gamma$ -TuRCs to Cnn-T and Cnn-C<sup>Δ1-77</sup> scaffolds (Figure 1H), suggesting

212 that these  $\gamma$ -TuRCs are able to nucleate microtubules. While it is possible that some  
213 microtubules could have been generated independently of  $\gamma$ -TuRCs, a process that occurs by  
214 tubulin concentration at *C. elegans* SPD-5 condensates formed *in vitro* (Woodruff et al., 2017),  
215 the increased microtubule organising capacity at Cnn-T and Cnn-C $\Delta^{1-77}$  scaffolds (high  $\gamma$ -TuRC  
216 recruitment) compared to at Cnn-C scaffolds (low  $\gamma$ -TuRC recruitment) suggests that  $\gamma$ -TuRC-  
217 mediated microtubule nucleation/organisation is the predominant factor at these Cnn  
218 scaffolds.

219

220 Filming Cnn-T scaffolds through time revealed that these scaffolds could merge and could  
221 also be quite mobile, especially those that had microtubules emanating from just one side  
222 (Video 1). We could also observe events where spindle-like structures formed between  
223 adjacent Cnn-T or Cnn-C $\Delta^{1-77}$  scaffolds (Figure 3D; Video 2 and 3), suggesting that the  
224 microtubules are dynamic and can be regulated by motor proteins. Giant Cnn-T scaffolds that  
225 rotated dragged their attached microtubules through the cytosol, indicating that the  
226 microtubules were robustly anchored to the scaffolds (Video 4). In summary, Cnn-T scaffolds  
227 can recruit  $\gamma$ -TuRCs that are capable of nucleating and anchoring microtubules.

228

### 229 **Phospho-mimetic mutations help relieve CAI domain mediated auto-inhibition**

230 How could CAI domain mediated auto-inhibition be relieved to allow efficient binding to  $\gamma$ -  
231 TuRCs at MTOCs? Studies in human cells, *C. elegans*, and *S. cerevisiae* have shown that  
232 binding of CM1 domain proteins to  $\gamma$ -TuSCs or  $\gamma$ -TuRCs is promoted by phosphorylation close  
233 to the CM1 domain (Hanafusa et al., 2015; Ohta et al., 2021; Lin et al., 2014b) (Figure S3B).  
234 Moreover, Cnn-C binds  $\gamma$ -TuRCs and is phosphorylated only at centrosomes (Zhang and  
235 Megraw, 2007; Conduit et al., 2014b; a), suggesting a possible link between binding and  
236 phosphorylation.

237

238 In an attempt to find phosphorylation sites that may relieve CAI domain inhibition, we aligned  
239 amino acids 1 to ~255 of Cnn-C homologues from various *Drosophila* species. We identified  
240 three putative phosphorylation “patches” (P1, P2, P3) based on a high concentration of  
241 conserved serine and threonine residues (Figure 4A; Figure S3). P1 represented the only  
242 region within the CAI domain with predicted secondary structure, corresponding to an  $\alpha$ -helix  
243 (Figure S3). We compared the amount of  $\gamma$ -tubulin that co-IP'd with purified MBP-tagged N-  
244 terminal fragments of Cnn-C containing phospho-mimetic mutations (S>D or T>E) in all serine  
245 and threonine residues within either P1 (MBP-Cnn-C-N<sup>P1</sup>), P2 (MBP-Cnn-C-N<sup>P2</sup>), P3 (MBP-  
246 Cnn-C-N<sup>P3</sup>), or in all three patches (MBP-Cnn-C-N<sup>P1-3</sup>). The original MBP-Cnn-C-N (low

247 binding) and MBP-Cnn-T-N (high binding) fragments were included as negative and positive  
248 controls, respectively. Of these phospho-mimetic fragments, MBP-Cnn-C-N<sup>P1</sup> co-IP'd  $\gamma$ -tubulin  
249 most efficiently, although not as efficiently as MBP-Cnn-T-N (Figure 4B,D). We therefore  
250 generated phospho-mimetic fragments where either the proximal (S<sup>21</sup>, S<sup>22</sup>, T<sup>27</sup>) or distal (T<sup>31</sup>,  
251 T<sup>33</sup>, S<sup>34</sup>) three residues within P1 were mimicked (MBP-Cnn-C-N<sup>P1a</sup> or MBP-Cnn-C-N<sup>P1b</sup>,  
252 respectively). We also phospho-mimicked T<sup>27</sup> alone (MBP-Cnn-C-N<sup>T27</sup>), because T<sup>27</sup> is a  
253 putative Polo/Plk1 site and because a previous study reported centrosome defects when this  
254 site was mutated *in vivo* (Eisman et al., 2015). MBP-Cnn-C-N<sup>P1a</sup> and MBP-Cnn-C-N<sup>T27</sup>, but  
255 not MBP-Cnn-C-N<sup>P1b</sup>, co-IP'd more  $\gamma$ -tubulin than MBP-Cnn-C-N, although again not as much  
256 as MBP-Cnn-T-N (Figure 4C,D). In the scaffold assay, phospho-mimicking T<sup>27</sup> also had a  
257 positive effect that was not as strong as that seen with Cnn-T or Cnn-C <sup>$\Delta$ 1-77</sup> scaffolds. The  
258 mean S value for Cnn-C<sup>T27</sup> scaffolds (1.35) was ~2.4-fold higher than for Cnn-C scaffolds  
259 (0.57) but still lower than the S values for Cnn-T or Cnn-C <sup>$\Delta$ 1-77</sup> scaffolds (Figure 4G; note that  
260 S values for Cnn-C<sup>T27E</sup> scaffolds, and subsequent scaffolds analysed below, were compared  
261 to the S values for Cnn-C, Cnn-T and Cnn-C <sup>$\Delta$ 1-77</sup> scaffolds from Figure 1H). Together, this  
262 suggested that while phosphorylation of T<sup>27</sup> may be involved in relieving CAI domain auto-  
263 inhibition (or in directly increasing the binding affinity between Cnn-C and  $\gamma$ -TuRCs), it is not  
264 sufficient for robust  $\gamma$ -TuRC binding.

265

266 We therefore considered other putative phosphorylation sites. Phosphorylation slightly  
267 downstream of the CM1 domain promotes binding to  $\gamma$ -TuRCs in humans and *C. elegans* CM1  
268 domain proteins (Ohta et al., 2021; Hanafusa et al., 2015). While the sequence surrounding  
269 the CM1 domain is not conserved across diverse species (Figure S3B), we identified two  
270 serine residues (S173 and S186) downstream of Cnn's CM1 domain that were conserved in  
271 *Drosophila* species (Figure S3A). These sites also mapped to a similar predicted coiled-coil  
272 region to the sites in human CDK5RAP2 and *C. elegans*' SPD-5 (Figure S3B). While phospho-  
273 mimicking S<sup>173</sup> had no effect, scaffolds with a phospho-mimic mutation at S<sup>186</sup> (Cnn-C<sup>S186D</sup>  
274 scaffolds) recruited ~3.8-fold more  $\gamma$ -tubulin than Cnn-C scaffolds (Figure 4G). Moreover, N-  
275 terminal fragments containing this mutation (Cnn-C-N<sup>S186</sup>) co-IP'd  $\gamma$ -tubulin with a similar, if  
276 not higher, efficiency compared to the Cnn-T-N or Cnn-C <sup>$\Delta$ 1-77</sup> fragments (Figure 4E). In  
277 addition, although not apparent in the scaffold assay (Figure 4G), phospho-mimicking both T<sup>27</sup>  
278 and S<sup>186</sup> had a synergistic effect in the co-IP assay, where Cnn-C-N<sup>T27,S186</sup> fragments co-IP'd  
279 significantly more  $\gamma$ -tubulin than any other type of fragment (Figure 4F). The same pattern was  
280 seen when co-immunoprecipitating the  $\gamma$ -TuRC-specific protein Grip75<sup>GCP4</sup>-sfGFP (Figure  
281 4E). Unexpectedly, unlike in the co-IP assay, we did not see increased recruitment of

282 Grip75<sup>GCP4</sup>-sfGFP to scaffolds containing any of the N-terminal phospho-mimetic mutations,  
283 including Cnn-C<sup>T27,S186</sup> scaffolds (Figure 4H). This suggested that these scaffolds recruit  $\gamma$ -  
284 TuSCs rather than  $\gamma$ -TuRCs, potentially explaining why they do not recruit  $\gamma$ -tubulin to the  
285 levels seen at Cnn-T or Cnn-C <sup>$\Delta$ 1-77</sup> scaffolds (Figure 4G). Nevertheless, Cnn-C<sup>T27,S186D</sup>  
286 scaffolds did organise microtubules more readily than Cnn-C scaffolds (Figure 4I – data  
287 compared to that in Figure 3D), suggesting that the  $\gamma$ -tubulin complexes bound by the  
288 phospho-mimetic forms of Cnn-C are at least semi-functional. Thus, while there are some  
289 differences between the scaffold assay and the co-IP assay, the data collectively suggest that  
290 phosphorylation at T<sup>27</sup> and in particular at S<sup>186D</sup> help to relieve CAI domain auto-inhibition and  
291 promote the binding of Cnn-C to  $\gamma$ -TuRCs.

292

### 293 **Ubiquitous expression of Cnn-C containing the high binding-affinity Cnn-T N-terminal** 294 **region has a dominant negative effect and leads to fertility defects**

295 We next wanted to test whether Cnn-C auto-inhibition is important for cell and developmental  
296 fidelity in *Drosophila*. We generated a transgenic fly line by random insertion of a ubiquitously-  
297 driven untagged Cnn-C construct in which its N-terminal region had been replaced with the N-  
298 terminal region of Cnn-T (pUbq-Cnn-C<sup>T</sup>) (Figure 5A). Based on our data so far, this form of  
299 Cnn should bind strongly to cytosolic  $\gamma$ -TuRCs but otherwise be regulated normally. We also  
300 generated a control line ubiquitously expressing untagged wild-type Cnn-C (pUbq-Cnn-C),  
301 whose binding to cytosolic  $\gamma$ -TuRCs should be restricted by the CAI domain.

302

303 It was difficult to generate a viable pUbq-Cnn-C<sup>T</sup> line and, once generated, was difficult to  
304 maintain and combine with other alleles. Thus, all following experiments were performed with  
305 the pUbq constructs expressed in the presence of endogenous Cnn. By crossing pUbq-Cnn-  
306 C and pUbq-Cnn-C<sup>T</sup> females or males to wild-type flies and quantifying embryo hatching rates,  
307 we found that pUbq-Cnn-C<sup>T</sup> flies were less able to generate progeny than pUbq-Cnn-C flies,  
308 with males being more affected than females (Figure 5B). Western blots of embryo or testes  
309 extracts using different Cnn-C antibodies and a Cnn-T-specific antibody showed that the level  
310 of pUbq-Cnn-C<sup>T</sup> (red arrowheads) relative to endogenous Cnn-C (black arrowheads) was  
311 higher in testes extracts compared to embryo extracts (Figure 5C). In the embryo extracts, the  
312 pUbq-Cnn-C<sup>T</sup> band was much weaker than the endogenous Cnn-C band, which is unusual for  
313 pUbq-driven Cnn constructs (P. Conduit unpublished observations), suggesting its expression  
314 was being suppressed. In contrast, the pUbq-Cnn-C<sup>T</sup> band was of a similar intensity to, if not  
315 higher than, the endogenous Cnn-C band in the testes extracts. We therefore conclude that,  
316 relative to endogenous Cnn-C, pUbq-Cnn-C<sup>T</sup> is weakly expressed within the maternal



317 germline but is expressed to levels similar to endogenous Cnn within the testes. While other  
318 factors could be involved, such as cell-specific effects of Cnn to  $\gamma$ -TuRC binding, these  
319 differences in the expression levels of pUbq-Cnn-C<sup>T</sup> between cells could explain the difference  
320 in the ability of male and female flies to generate progeny.

321

### 322 **Mis-regulation of binding to $\gamma$ -tubulin complexes results in ectopic microtubule** 323 **nucleation and defects during cell division**

324 The failure of pUbq-Cnn-C<sup>T</sup> flies to generate normal numbers of progeny suggested that  
325 ectopic binding of Cnn to  $\gamma$ -TuRCs leads to cellular defects during germline or early  
326 development. Co-IPs from embryo extracts confirmed that pUbq-Cnn-C<sup>T</sup> binds  $\gamma$ -TuRCs more  
327 efficiently than pUbq-Cnn-C (Figure 5D). Moreover, binding of Cnn to  $\gamma$ -TuRCs appears to  
328 promote microtubule nucleation within the cytosol, as unfertilised eggs injected with mRNA  
329 encoding the GFP-tagged N-terminal region of Cnn-T, which efficiently binds  $\gamma$ -TuRCs,  
330 frequently displayed dynamic microtubules throughout their cytosol (9/12 eggs) (Video 5). This  
331 was not observed in all 27 control-injected eggs. This effect is similar to that observed when  
332 expressing CM1-domain fragments within human and fission yeast cells (Choi et al., 2010;  
333 Cota et al., 2017; Hanafusa et al., 2015; Lynch et al., 2014) and suggests that CM1 domain  
334 binding to  $\gamma$ -TuRC also promotes microtubule nucleation in *Drosophila*.

335

336 To examine whether ectopic cytosolic microtubules formed within cells expressing pUbq-Cnn-  
337 C<sup>T</sup> and whether there were associated cell defects, we immunostained various fly tissues.  
338 There were no obvious defects within oocytes from pUbq-Cnn-C<sup>T</sup> flies, where the positions of  
339 the nucleus and Gurken protein, both dependent on proper microtubule organisation, were  
340 normal in oocytes from both pUbq-Cnn-C and pUbq-Cnn-C<sup>T</sup> females (Figure S4A-C). We did,  
341 however, frequently observe defects in fixed and stained syncytial embryos from pUbq-Cnn-  
342 C<sup>T</sup> females (Figure 6D-F) as compared to embryos from pUbq-Cnn-C females (Figure 6A-C).  
343 These defects included: an apparent excess of cytosolic microtubules, unusually bright  
344 microtubule asters, and nuclear organisation defects during S-phase (Figure 6D); highly  
345 disorganised spindles during M-phase (Figure 6E); and an apparent excess of cytosolic  
346 microtubules during telophase (Figure 6F). In a blind analysis of embryos, severe and  
347 moderate defects were observed in a higher proportion of embryos from pUbq-Cnn-C<sup>T</sup>  
348 females (19.4% severe and 30.6% moderate) than from wild-type (4.1% and 18.4%) or pUbq-  
349 Cnn-C (3.4% and 25%) females (Figure 6G). While half of the embryos from pUbq-Cnn-C<sup>T</sup>  
350 females were normal, this could reflect the relatively low expression of pUbq-Cnn-C<sup>T</sup> in the  
351 female germline (Figure 5C). Broadly, the categorisation of embryo defects in Figure 6G

352 reflects the observed hatching rates in Figure 5B, assuming that embryos with moderate and  
353 severe defects often fail in development.

354

355 Consistent with a very strong reduction in the ability of pUbq-Cnn-C<sup>T</sup> males to generate  
356 progeny, defects were frequently observed within their testes, where production of sperm  
357 involves a series of mitotic and meiotic cell divisions. When meiosis progresses normally, the  
358 64 round spermatids cells within the resulting cyst all contain a similarly sized phase-light  
359 nucleus and phase-dark nebenkern (which is an accumulation of mitochondria that were  
360 segregated during meiosis). This was true in round spermatids from pUbq-Cnn-C testes  
361 (Figure 7A,C), but not in round spermatids from pUbq-Cnn-C<sup>T</sup> testes (Figure 7B,C),  
362 suggesting that pUbq-Cnn-C<sup>T</sup> expression results in problems in chromosome segregation and  
363 cytokinesis. Indeed, a high density of cytosolic microtubules and clear meiotic defects were  
364 observed in spermatocytes within fixed and stained pUbq-Cnn-C<sup>T</sup>, but not pUbq-Cnn-C,  
365 testes. Defects were observed at various developmental stages and included cells with  
366 incorrect numbers of nuclei and centrosomes as well as cells containing multiple spindles  
367 (Figure 7D,E; Figure S5A,B). Thus, ectopic binding of pUbq-Cnn-C<sup>T</sup> to  $\gamma$ -TuRCs within  
368 spermatocytes appears to lead to ectopic microtubule nucleation within the cytosol and major  
369 defects during meiosis.

370

### 371 **Human CDK5RAP2 binding to $\gamma$ -TuRCs is also regulated by auto-inhibition, but the** 372 **precise mechanism differs from *Drosophila***

373 To examine whether auto-inhibition is a conserved feature of CM1 domain proteins, we tested  
374 the ability of various N-terminal fragments of human CDK5RAP2 (Figure 8A) to co-IP  $\gamma$ -tubulin  
375 from HEK cell extracts. The reported CM1 domain spans aa58-126 of CDK5RAP2 (Sawin et  
376 al., 2004; Zhang and Megraw, 2007) (Figure 8A) and a fragment spanning aa1-210 was less  
377 efficient at co-IP'ing  $\gamma$ -tubulin than a fragment spanning aa51-100 (also known as  $\gamma$ -TuNA  
378 (Choi et al., 2010)) (Figure 8A,B). This indicated that sequences either upstream or  
379 downstream of  $\gamma$ -TuNA are inhibitory for binding to  $\gamma$ -TuRCs. A fragment that included the  
380 sequence upstream of  $\gamma$ -TuNA (aa1-100) co-IP'd  $\gamma$ -tubulin more efficiently than  $\gamma$ -TuNA  
381 (Figure 8B), suggesting that, unlike in *Drosophila* Cnn, the sequence upstream of the CM1  
382 domain is not inhibitory but is instead required for efficient binding. In contrast, a fragment that  
383 included the sequence downstream of  $\gamma$ -TuNA (aa51-210) was less efficient than  $\gamma$ -TuNA at  
384 co-IP'ing  $\gamma$ -tubulin (Figure 8B). This suggests that the sequence downstream of CDK5RAP2's  
385 CM1 domain inhibits binding to  $\gamma$ -TuRCs. Thus, while auto-inhibition appears to regulate the



386 binding of CDK5RAP2 to  $\gamma$ -TuRCs as in flies, the precise mechanism appears to vary between  
387 species.  
388

## 389 Discussion

390 We have shown that the extreme N-terminal region of Cnn-C, which we name the CAI domain,  
391 inhibits Cnn-C from binding to  $\gamma$ -TuRCs. This auto-inhibition is important because expressing  
392 a form of Cnn that readily binds  $\gamma$ -TuRCs within the cytosol leads to spindle and cell division  
393 defects, possibly via the ectopic activation of  $\gamma$ -TuRCs. Phospho-mimicking experiments  
394 suggest that phosphorylation at sites close to the CM1 domain relieves auto-inhibition of Cnn-  
395 C and promotes binding to  $\gamma$ -TuRCs. This is consistent with Cnn-C being phosphorylated  
396 specifically at centrosomes during mitosis (Conduit et al., 2014a) where binding and activation  
397 of  $\gamma$ -TuRCs takes place. In addition, human CDK5RAP2 is inhibited from binding cytosolic  $\gamma$ -  
398 TuRCs by the region downstream of the CM1 domain. Thus, while the precise mechanism  
399 may vary, it appears that auto-inhibition is a conserved feature of CM1 domain proteins.

400

401 There is considerable evidence, including the work presented here, showing that binding of  
402 CM1-domain proteins to  $\gamma$ -tubulin complexes stimulates microtubule nucleation (Choi et al.,  
403 2010; Muroyama et al., 2016; Hanafusa et al., 2015; Cota et al., 2017; Lynch et al., 2014), but  
404 the reason remains unclear. One possibility is that binding leads to conformational changes in  
405  $\gamma$ -TuRCs, but human and *Xenopus*  $\gamma$ -TuRCs bound by CM1 domain fragments remain in an  
406 open, seemingly inactive, conformation (Wieczorek et al., 2019; Liu et al., 2019). Whether this  
407 is due to a low stoichiometry of binding remains unclear, but binding of the CM1 domain to *S.*  
408 *cerevisiae*  $\gamma$ -TuSCs/ $\gamma$ -TuRCs does result in structural changes that possibly promote  
409 nucleation activity (Brilot et al., 2019). It is also possible that CM1 domain binding has a  
410 context-specific effect. Adding CM1-domain fragments to purified  $\gamma$ -TuRCs within *Xenopus*  
411 egg extracts had a greater effect on nucleation efficiency when the extract was supplemented  
412 with activated Ran (Liu et al., 2019), and we find that expression of pUbq-Cnn-C<sup>T</sup> leads to  
413 defects within specific cell types (although these differences could simply be due to the  
414 differences in expression levels). Clearly, we need a better understanding of how CM1 domain  
415 binding promotes microtubule nucleation.

416

417 Phosphorylation appears to be an important mechanism for promoting binding between CM1  
418 domain proteins and  $\gamma$ -TuRCs. This is true for human CDK5RAP2, *C. elegans* SPD-5, and *S.*  
419 *cerevisiae* SPC110, where the phosphorylation sites that promote binding have been identified  
420 either upstream or downstream of the CM1 domain (Hanafusa et al., 2015; Lin et al., 2014b;  
421 Ohta et al., 2021). We show that phospho-mimicking sites both upstream and downstream of  
422 the CM1 domain also promotes binding of *Drosophila* Cnn-C to  $\gamma$ -TuRCs. We predict that  
423 phosphorylation helps to relieve the auto-inhibition imposed by the CAI domain as well as

424 directly increasing binding affinity between Cnn-C and  $\gamma$ -TuRCs. We find that phospho-  
425 mimicking S<sup>186</sup> alone allows robust binding to  $\gamma$ -TuRCs, suggesting that phosphorylating this  
426 single site is sufficient to relieve auto-inhibition fully, at least *in vitro*. Phospho-mimicking T<sup>27</sup>  
427 has a more subtle effect but has a strong effect when S<sup>186</sup> is also phospho-mimicked. This  
428 suggests that phospho-mimicking T<sup>27</sup> increases the binding affinity between Cnn-C and  $\gamma$ -  
429 TuRCs, rather than relieving auto-inhibition, and thus has a minimal effect when Cnn-C is  
430 auto-inhibited (when S<sup>186</sup> is not phospho-mimicked) but has a strong effect when Cnn-C  
431 inhibition is relieved (by S<sup>186</sup> phospho-mimicking). This would suggest that the CAI domain,  
432 which contains T<sup>27</sup>, is also involved in binding to  $\gamma$ -TuRCs once inhibition is relieved. A role  
433 for the region upstream of the CM1 domain in binding to  $\gamma$ -TuRCs may be conserved, as our  
434 data shows this region is promotes binding of human CDK5RAP2 to  $\gamma$ -TuRCs.

435

436 In future, it will be important to understand how the CAI domain inhibits the CM1 domain. We  
437 previously postulated that the extreme N-terminal region of Cnn-C (i.e. the CAI domain) might  
438 fold back and sterically inhibit the CM1 domain (Tovey et al., 2018). Our data is consistent  
439 with this possibility and, in our view, this is the most likely explanation. A similar mechanism  
440 has also been proposed in *C. elegans* (Ohta et al., 2021). Nevertheless, there are alternative  
441 possibilities, including that the CAI domain could recruit another protein that interferes with  
442 CM1 domain binding. In any case, it will be interesting to compare how auto-inhibition is  
443 achieved in different homologues, especially given that the region downstream, not upstream,  
444 of the CM1 domain appears to mediate inhibition in human CDK5RAP2.

445

446 Importantly, our data also highlights differences in how binding between CM1 domain proteins  
447 and  $\gamma$ -TuRCs is regulated within different cell types and at different MTOCs. We have shown  
448 that the testes specific Cnn-T isoform, which lacks the CAI domain, can bind efficiently to  $\gamma$ -  
449 tubulin complexes in the apparent absence of any upstream regulatory events. Cnn-T is  
450 expressed primarily within developing sperm cells and isoform-specific C-terminal exons  
451 mediate its recruitment to mitochondria, where it binds and recruits  $\gamma$ -tubulin complexes (Chen  
452 et al., 2017). The mitochondrial surface is very different from mature centrosomes, which  
453 concentrate a selection of kinases. It therefore seems appropriate that Cnn-T isoforms do not  
454 appear to rely on phosphorylation for binding. Presumably, binding and potential activation of  
455  $\gamma$ -TuRCs within the shrinking cytosol of developing sperm cells is not detrimental to sperm  
456 development (and may even be important for amplifying cytoplasmic microtubules), unlike in  
457 dividing cells where our data shows that spindle formation and cytokinesis are clearly  
458 perturbed.

459

460 In summary, the data presented here provide important insights into how and why binding of  
461 CM1 domain proteins to  $\gamma$ -TuRCs is regulated. Future studies will help elucidate the precise  
462 mechanism underlying auto-inhibition of the CM1 domain and how this may vary between  
463 species. It will also be important to determine whether CM1 domain binding directly activates  
464  $\gamma$ -TuRCs and, if not, how CM1 domain binding promotes microtubule nucleation.

## 465 **Materials and Methods**

466

### 467 **DNA cloning**

468 5-alpha competent *E. coli* cells (high efficiency, NEB) were used for bacterial transformations.  
469 DNA fragments were purified using QIAquick Gel Extraction kits (Qiagen); plasmid purification  
470 was performed using QIAprep Spin Miniprep kits (Qiagen). Phusion high-fidelity PCR master  
471 mix with HF buffer (ThermoFisher Scientific) was used for PCRs.

472

### 473 **Transgenic *Drosophila* lines**

474 All endogenously-tagged lines were made using CRISPR combined with homologous  
475 recombination, by combining the presence of a homology-repair vector containing the desired  
476 insert with the appropriate guide RNAs and Cas9. The  $\gamma$ -tubulin37C-mCherry and Grip128-  
477 sfGFP alleles were generated by inDroso. For  $\gamma$ -tubulin37C-mCherry, eggs from nos-Cas9  
478 expressing females were co-injected with a plasmid encoding the expression of dual guides  
479 targeting each side of the 3'UTR, TACACATATCAAGATACATG and  
480 CCCAGATCGATTATCCCCAG, and a plasmid containing a SSSS-mCherry-3'UTR-LoxP-  
481 3xP3-dsRED-Lox P cassette flanked by homology arms (the multi-serine insert acts as a  
482 flexible linker). After screening for dsRED, the selection marker was excised by Cre  
483 recombination. For Grip128-sfGFP, eggs from nos-Cas9 expressing females were co-injected  
484 with a plasmid encoding the expression of a single guide containing the target sequence  
485 ATGGGGCACACTGGAGTTGA and with a pBluescript plasmid containing sfGFP and linker  
486 sequence (4X GlyGlySer) flanked on either side by 1.5kb of DNA homologous to the genomic  
487 locus surrounding the 3' end of the appropriate coding region. The homology vector was made  
488 within the lab (and sent to InDroso) by HiFi assembly (NEB) of PCR fragments generated from  
489 genomic DNA prepared from nos-Cas9 flies (using MicroLYSIS, Microzone) and a vector  
490 containing the sfGFP tag (DGRC, 1314). Screening for the insert was performed with the  
491 following primers: AGGAAGATGCGAACACACGT and GTACAGCTCATCCATGCCCA.

492

493 The Grip75-sfGFP and Grip163-sfGFP lines were made within the lab following a similar  
494 approach to that used previously (Tovey et al., 2018; Mukherjee et al., 2020). Flies expressing  
495 a single guide RNA containing the target sequence CAAAACATCGTATTCATG or  
496 ACCACTATTACAAGGTATCT for Grip75-sfGFP or Grip163-sfGFP, respectively, were  
497 crossed to nos-Cas9 expressing females and the resulting embryos were injected with  
498 homology vectors by the Department of Genetics Fly Facility, Cambridge, UK. The homology  
499 vectors comprised a pBluescript plasmid containing sfGFP and linker sequence (4X

500 GlyGlySer) flanked on either side by 1.5kb of DNA homologous to the genomic locus  
501 surrounding the 3' end of the appropriate coding region. The homology vectors were made as  
502 for Grip128-sfGFP. F1 and F2 males were screened by PCR using the following primers: for  
503 Grip75-sfGFP: GAGAAGTTTGCGCATATGACCC and AGCAGCACCATGTGATCGCGC; for  
504 Grip163-sfGFP: AGTCGCAGTCCTTTATTGTGG and  
505 AGCAGCACCATGTGATCGCGC.

506

507 pUbq-Cnn-C and pUbq-Cnn-C<sup>T</sup> were made from a pDONR-Cnn-C vector (gift from Jordan  
508 Raff). To generate a Cnn-T-specific N-terminal region of Cnn, an appropriate DNA fragment  
509 (made by GENEWIZ, based on the FlyBase sequence of Cnn-T) was synthesised and  
510 amplified by PCR and used to replace the N-terminal region of Cnn in a pDONR-Cnn-C vector  
511 cut with XmaI. The pDONR-Cnn-C and newly made pDONR-Cnn-T vectors were then inserted  
512 into a pUbq transformation vector (gift from Jordan Raff) by Gateway cloning (ThermoFisher  
513 Scientific). All DNA vectors were injected into embryos by the Department of Genetics Fly  
514 Facility, Cambridge, UK.

515

516 The Jupiter-mCherry line used to monitor microtubule nucleation was a gift from Jordan Raff's  
517 lab. The original line was a GFP trap line from Daniel St. Johnston's lab and the GFP was  
518 replaced with mCherry.

519

## 520 **Recombinant protein cloning, expression and purification**

521 Fragments of Cnn-C-N and Cnn-T-N used in co-IP experiments were amplified from the  
522 pDONR-Cnn-C and pDONR-Cnn-T vectors described above by PCR and inserted into a  
523 pDEST-HisMBP (Addgene, #11085) vector by Gateway cloning (Thermo Fisher Scientific).  
524 Proteins were expressed in *E. coli* (BL21-DE3) and purified using affinity chromatography.  
525 MBP-tagged fragments were purified by gravity flow through amylose resin (New England  
526 Biolabs) and step elution in maltose. The concentration of each fraction was determined on a  
527 Nanodrop and peak fractions were diluted 1:1 with glycerol and stored at -20°C. Truncated  
528 fragments of Cnn-C were made by modification of the pDONR-Cnn-C-N entry clone. The N-  
529 terminal region was removed by a Quikchange reaction (Agilent), and the resulting shortened  
530 fragment was inserted into the pDEST-HisMBP destination vector via a Gateway reaction.

531

532 Phospho-mimetic fragments were created by modifying the pDONR-Cnn-C-N entry clone. The  
533 pDONR-Cnn-C-N backbone was linearised by PCR or by digestion, omitting the phospho-  
534 patch to be replaced. Phosphomimetic patches in which all S/T residues were swapped for

535 D/E residues, respectively, were synthesised either by PCR using two overlapping primers or  
 536 by GENEWIZ. They were inserted into the linear backbone by HiFi Assembly (NEB). The entry  
 537 clones were checked by restriction enzyme digest and sequencing before being inserted into  
 538 the pDEST-HisMBP destination vector via a Gateway reaction.

539  
 540 pRNA vectors were made by modification of the pDONR-Cnn-C-PReM<sup>P</sup> vector containing  
 541 phospho-mimetic mutations in the PReM domain (Conduit et al., 2014a). N-terminal variants  
 542 were introduced by restriction digests (SspI-HF and AatII) of pDONR-Cnn-C, pDONR-Cnn-T,  
 543 and pDONR-Cnn-C-PReM<sup>P</sup> entry clones. Fragments were combined as necessary by NEB  
 544 HiFi assembly to create new pDONR vectors, which were inserted into a pRNA-GFP or pRNA-  
 545 mKate destination vector (Conduit et al., 2014a) via a Gateway reaction. The Cnn-T-N  
 546 fragment was inserted directly into pRNA-GFP destination vectors via Gateway cloning.

547  
 548 Fragments of CDK5RAP2 were synthesised by Genewiz, amplified by PCR, and cloned into  
 549 a pCMV-GFP vector (gift from Jens Lüders) by restriction digest and HiFi assembly (NEB).

550

551 **Primers**

|                                 | <b>Forward primer</b>                                                                  | <b>Reverse primer</b>                                                                    |
|---------------------------------|----------------------------------------------------------------------------------------|------------------------------------------------------------------------------------------|
| Cnn-C-N<br>fragment             | GGGGACAAGTTTGTACAAAAA<br>GCAGGCTTAATGGACCAGTCTA<br>AACAGGTTTTGC                        | GGGGACCACTTTGTACAAGAAAG<br>CTGGGTTCTATAGGCGCTCGGCC<br>AAC                                |
| Cnn-T-N<br>fragment             | GGGGACAAGTTTGTACAAAAA<br>GCAGGCTTAATGAATAGTAATC<br>GAACGTCGTCTTCG                      | GGGGACCACTTTGTACAAGAAAG<br>CTGGGTTCTATAGGCGCTCGGCC<br>AAC                                |
| Cnn-C-N <sup>P1</sup><br>insert | GCGGGACTATTGCGGCGACGG<br>CAATGGTACCTGTGCAGACGAC<br>TTGAAGGAAATCGAGTTAATTG<br>AGGAGGTGG | GCAGGACCCTTCTGTGCGATTTTCG<br>GCGGCGCCATTCTCCTCCAGGAA<br>GTCCTCCACCTCCTCAATTA<br>CGATTTCC |
| Cnn-C-N <sup>P2</sup><br>insert | CCTGCGCAAAGTAGCCGAGGC<br>ACTGGACAAAGACATAGACGAC<br>GAGGACCCGGGAGCCCTGCAA<br>GATGTTCG   | CGCCTGGAGGTCGTGGAACGTC<br>AAAGTCGGCATAGTCGTTCTCCA<br>TCTCGACATCTTGCAGGGCTCCC<br>GGGTCC   |
| Cnn-C-N <sup>P3</sup><br>insert | GGGTCAGCCGGGTGCCCGGGC<br>AGACGACGACGAGGAAGACTTA                                        | CCTTGAGCAGCTCCATCTTTACA<br>TCGACCTCTTTTCTCAACTCCGC                                       |

|                                  |                                                                                        |                                                                                             |
|----------------------------------|----------------------------------------------------------------------------------------|---------------------------------------------------------------------------------------------|
|                                  | GACAAACAGCTCATCGATGCCA<br>AGATCGAAATCGC                                                | GATTCGATCTTGGCATCGATGA<br>GC                                                                |
| Cnn-C-N <sup>P1a</sup><br>insert | GCGGGACTATTGCGGCGACGG<br>CAATGGTACCTGTGCAGACGAC<br>TTGAAGGAAATCGAGTTAATTG<br>AGACCGTGA | GGACCCTTCTGTTCGATTTTCGGCG<br>GCGCCATTCTCCTCCAGGAACT<br>GGTCACGGTCTCAATTAECTCGA<br>TTTCCTTC  |
| Cnn-C-N <sup>P1b</sup><br>insert | GCGGGACTATTGCGGCGACGG<br>CAATGGTACCTGTGCATCGTCC<br>TTGAAGGAAATCACCTTAATTG              | GGACCCTTCTGTTCGATTTTCGGCG<br>GCGCCATTCTCCTCCAGGAAGTC<br>CTCCACCTCCTCAATTAAGGTGA<br>TTTCCTTC |
| Cnn-C-N <sup>T27</sup><br>insert | GCGGGACTATTGCGGCGACGG<br>CAATGGTACCTGTGCATCGTCC<br>TTGAAGGAAATCGAGTTAATTG<br>AGACCGTGA | GGACCCTTCTGTTCGATTTTCGGCG<br>GCGCCATTCTCCTCCAGGAACT<br>GGTCACGGTCTCAATTAECTCGA<br>TTTCCTTC  |
| Cnn-C-N <sup>Δ1-77</sup>         | GCCAACTTTGTACAAAAAAGCA<br>GGCTTAATGGCCAGTTTTGACG<br>TTCC                               | GGAACGTCAAAGCTGGCCATTAA<br>GCCTGCTTTTTTGTACAAAGTTG<br>GC                                    |
| CDK5RAP2<br>aa1-210              | GGGGACAAGTTTGTACAAAAAAGC<br>AGGCTTAATGATGGACTTGGTGT<br>GGAAGAGG                        | GGGGACCACTTTGTACAAGAAAGCT<br>GGGTTTCACAAGTCCCCCTCGTGCA<br>TCTTC                             |
| CDK5RAP2<br>aa51-100             | GGGGACAAGTTTGTACAAAAAAGC<br>AGGCTTAATGACAGTGTCTCCAC<br>CAGAGCAGC                       | GGGGACCACTTTGTACAAGAAAGCT<br>GGGTTTCAGTAGATATGTTTCAGTGG<br>G                                |
| CDK5RAP2<br>aa51-210             | GGGGACAAGTTTGTACAAAAAAGC<br>AGGCTTAATGACAGTGTCTCCAC<br>CAGAGCAGC                       | GGGGACCACTTTGTACAAGAAAGCT<br>GGGTTTCACAAGTCCCCCTCGTGCA<br>TCTTC                             |
| CDK5RAP2<br>aa1-100              | GGGGACAAGTTTGTACAAAAAAGC<br>AGGCTTAATGATGGACTTGGTGT<br>GGAAGAGG                        | GGGGACCACTTTGTACAAGAAAGCT<br>GGGTTTCAGTAGATATGTTTCAGTGG<br>G                                |

552

553

554 **Immunoprecipitation**

555 1g/ml of embryos were homogenised with a hand-pestle in homogenisation buffer containing

556 50 mM HEPES, pH7.6, 1mM MgCl<sub>2</sub>, 1 mM EGTA, 50 mM KCl supplemented with PMSF 1:100,



557 Protease Inhibitor Cocktail (1:100, Sigma Aldrich) and DTT (1M, 1:1000). Extracts were  
558 clarified by centrifugation twice for 15 minutes at 16,000 rcf at 4°C.

559

560 For the MBP-Cnn fragment IPs, 30 µl magnetic ProteinA dynabeads (Life Technologies)  
561 coupled to anti-MBP antibodies (gift from Jordan Raff) were incubated with an excess of  
562 purified MBP-Cnn fragments and rotated for 1 hour at 4°C. Unbound fragments were washed  
563 off in PBST, and the saturated beads were resuspended in 100 µl embryo extract and rotated  
564 at 4°C overnight. Beads were washed 5 times for 1 min each in PBST, boiled in 50 µl 2x  
565 sample buffer, and separated from the sample using a magnet. Samples were analysed by  
566 western blotting as described.

567

568 For the Grip-GFP IPs, 20 µl high-capacity ProteinA beads (Abcam) coupled to anti-MBP  
569 antibodies (gift from Jordan Raff) were incubated with an excess of purified MBP-Cnn  
570 fragments and rotated at 4°C for 1 hour. Unbound fragments were washed off in PBST and  
571 the saturated beads were resuspended in 65 µl embryo extract and rotated at 4°C overnight.  
572 Beads were washed 5 times for 1 min each in PBST, boiled in 2x sample buffer, and separated  
573 from the sample by centrifugation. Samples were analysed by western blotting as described.

574

575 For the IPs from pUbq-Cnn-C and pUbq-Cnn-C<sup>T</sup> embryo extract, 50 µl magnetic ProteinA  
576 dynabeads (Life Technologies) coupled to anti-Cnn (C-terminal) antibodies (gift from Jordan  
577 Raff) were rotated in 100 µl embryo extract at 4°C overnight. Beads were washed 5 times for  
578 1 min each in PBST, boiled in 2x sample buffer, and separated from the sample using a  
579 magnet. Samples were analysed by western blotting as described. We had tried these IPs  
580 using beads coated with the anti-Cnn-T<sup>N</sup> antibody but found that they did not pull down any  
581 protein (data not shown), presumably as this antibody was raised against a peptide antigen  
582 and recognises only denatured pUbq-Cnn-C<sup>T</sup> on western blots.

583

#### 584 **Electrophoresis and western blotting**

585 Samples were run on 4-20% TGX Precast Gels (BioRad) (except Figure 5C and D, in which  
586 samples were run on 7.5% TGX Precast gels (BioRad)), alongside 5µl Precision Plus  
587 WesternC Standard markers (BioRad). For western blotting, semi-dry blotting was carried out  
588 using TransBlot Turbo 0.2µm nitrocellulose membrane transfer packs (BioRad), and a  
589 TransBlot Turbo transfer system running at 1.3A, up to 25V, for 7 minutes (BioRad mixed  
590 molecular weight pre-set programme). Membranes were stained with Ponceau and washed,  
591 first with distilled water then with milk solution (PSBT + 4% milk powder), and then blocked in

592 milk solution for 1 hour at room temperature. Sections of blots were incubated with primary  
593 antibodies as indicated in figures (antibodies found in table). Blots were incubated with  
594 horseradish peroxidase (HRP)-conjugated anti-mouse, anti-rabbit, or anti-sheep secondary  
595 antibodies (1:2000 in PSBT + 4% milk powder, ImmunoReagents) as appropriate for 45 mins  
596 at room temperature, washed in PSBT 3 times for 15 mins each, and then incubated with ECL  
597 substrate (BioRad ECL Clarity or ThermoFisher SuperSignal West Femto Max) for 5 minutes.  
598 Membranes were imaged using a Kodak Image Station 4000R or a BioRad ChemiDoc.

599

### 600 **Mass spectrometry**

601 Samples were run into TGX Precast Gels (BioRad) and the gels were rinsed in dH<sub>2</sub>O. Bands  
602 were excised using a clean razor blade and cut into 1mm<sup>2</sup> pieces on a fresh glass slide and  
603 placed into a microtube. Co-IP samples were processed by the Mass Spectrometry facility at  
604 the Department of Biochemistry, University of Cambridge with LC-MS/MS analysis using a  
605 Dionex Ultimate 3000 RSLC nanoUPLC (Thermo Fisher Scientific Inc, Waltham, MA, USA)  
606 system and a Q Exactive Orbitrap mass spectrometer (Thermo Fisher Scientific Inc, Waltham,  
607 MA, USA).

608

609 Post-run, all MS/MS data were converted to mgf files and the files were then submitted to the  
610 Mascot search algorithm (Matrix Science, London UK, version 2.6.0) and searched against  
611 the Uniprot *Drosophila\_melanogaster\_20180813* database (23297 sequences; 16110808  
612 residues) and common contaminant sequences containing non-specific proteins such as  
613 keratins and trypsin (123 sequences; 40594 residues). Variable modifications of oxidation (M),  
614 deamidation (NQ) and phosphorylation (S,T and Y) were applied as well a fixed modification  
615 of carbamidomethyl (C). The peptide and fragment mass tolerances were set to 20ppm and  
616 0.1 Da, respectively. A significance threshold value of  $p < 0.05$  and a peptide cut-off score of  
617 20 were also applied.

618

### 619 **Antibodies**

620 Primary antibodies used in the study are indicated in the table below. For western blotting,  
621 primary and secondary antibodies were diluted in PBST + 4% milk; primary antibodies were  
622 diluted at concentrations indicated in the table; secondary antibodies were diluted at 1:2000.  
623 For immunostaining, primary and secondary antibodies were diluted in PBS + 0.1% Triton  
624 (PBT) + 5% BSA; primary antibodies were diluted at concentrations indicated in the table;  
625 secondary antibodies (AlexaFluor 488, 561, or 633 conjugated secondary antibodies

626 (ThermoFisher)) were diluted at 1:1000 for testes and 1:1500 for embryos. DNA was stained  
 627 with Hoechst (Life Technologies, 33342) or DAPI.  
 628

| Antibody                               | WB Concentration | IF Concentration | Source                |
|----------------------------------------|------------------|------------------|-----------------------|
| $\alpha$ -Tubulin mouse monoclonal     | -                | 1:1000           | Sigma Aldrich, DM1a   |
| Asl (N-terminal) guinea pig polyclonal | 1:1000           | 1:1000           | Gift from Jordan Raff |
| Cnn (N-terminal) rabbit monoclonal     | 1:1000           | 1:1000           | Gift from Jordan Raff |
| Cnn (C-terminal) sheep polyclonal      | 1:1000           | -                | Gift from Jordan Raff |
| Cnn-T <sup>N</sup> Rabbit polyclonal   | 1:500            | -                | This study            |
| $\gamma$ -Tubulin mouse monoclonal     | 1:500            | 1:500            | Sigma Aldrich, GTU-88 |
| $\gamma$ -Tubulin rabbit polyclonal    | -                | 1:500            | Sigma Aldrich, T5192  |
| GFP mouse monoclonal                   | 1:250 or 1:500   | 1:250 or 1:500   | Roche, 11814460001    |
| Grip71 rabbit polyclonal               | 1:100            | 1:100            | CRB (crb2005268)      |
| MBP rabbit polyclonal                  | 1:3000           | -                | Gift from Jordan Raff |
| Phospho-histone H3 rabbit polyclonal   | -                | 1:500            | Abcam, AB5176         |
| Staufen Mouse monoclonal               | -                | 1:100            | Santa Cruz dN-16      |
| Gurken Mouse monoclonal                | -                | 1:200            | DSHB 1D12             |
| Lamin Dm0                              | -                | 1:30             | DSHB 84.12            |

629

### 630 Immunostaining

631 Testes were dissected in PBS, fixed in 4% paraformaldehyde for 30 minutes, washed 3x 5  
 632 minutes in PBS and incubated in 45% and then 60% acetic acid before being squashed onto  
 633 slides and flash-frozen in liquid nitrogen. Coverslips were removed and samples were post-  
 634 fixed in methanol at -20°C, washed 3x 15 minutes in PBS + 0.1% Triton (PBST), then  
 635 incubated overnight in a humid chamber at 4°C with primary antibodies diluted in PBST + 5%  
 636 BSA + 0.02% azide. Slides were washed 3x 5 minutes in PBST and then incubated for 2 hours  
 637 at room temperature with Alexa-Fluor secondary antibodies (ThermoFisher) (all 1:1000 in

638 PBST + 5% BSA + 0.02% azide). Slides were washed 3x 15 minutes in PBST, 10 minutes in  
639 PBST with Hoechst, and then 5 minutes in PBST. 10  $\mu$ l of mounting medium (85% glycerol in  
640 water + 2.5% N-propyl-galate) was placed on top of the tissue and a coverslip was gently  
641 lowered and sealed with nail varnish.

642

643 Embryos were collected within 2-3 hours of laying and were dechorionated in 60% bleach for  
644 2 minutes. Vitelline membranes were punctured with a combination heptane and methanol +  
645 3% EGTA (0.5M) before three washes in neat methanol. Embryos were fixed in methanol at  
646 4°C for at least 24 hours before rehydrating. Embryos were rehydrated by washing 3x 20 mins  
647 in PBST, then blocked in PBST + 5% BSA for 1 hour, followed by overnight incubation in  
648 primary antibodies in PBST + 5% BSA at 4°C. Embryos were washed 3x 20 mins in PBST at  
649 room temperature, then incubated for 2 hours at room temperature with Alexa-Fluor secondary  
650 antibodies (ThermoFisher) (all 1:1500 in PBST + 5% BSA). Finally, embryos were washed 3x  
651 20 mins in PBST at room temperature before being mounted in Vectashield containing DAPI  
652 (VectorLabs).

653

654 Oocytes were dissected from 2-day-old females. For Staufen and Gurken detection, 10 to 15  
655 ovaries were fixed with PBS buffer containing 4% paraformaldehyde and 0.1% Triton X-100,  
656 washed three times for 5 mins in PBST and blocked in PBST containing 1% BSA. Incubation  
657 with the primary antibodies (anti-Staufen, Santa Cruz; anti-Gurken 1D12, DSHB) was  
658 performed overnight at room temperature or 4°C for Staufen and Gurken labelling,  
659 respectively, in PBT (PBS containing 0.1% BSA and 0.1% Tween 20). The ovaries were then  
660 briefly washed three times and three times for 30 min each in PBT and incubated for 2 hours  
661 at room temperature in Alexa-conjugated secondary antibodies. The ovaries were then  
662 washed 3x for 15 min each time in PBST, dissected, and mounted in Citifluor (Electron  
663 Microscopy Science).

664

### 665 **Phase contrast imaging of round spermatids**

666 For analysis of round spermatids under phase contrast, testes were dissected in PBS,  
667 transferred to a 50 $\mu$ l droplet of PBS on a slide, cut open midway along the testes and, under  
668 observation, gently squashed under a coverslip using blotting paper.

669

### 670 **mRNA preparation and injection**

671 pRNA vectors containing the appropriate cDNA were generated using Gateway cloning of  
672 PCR amplified cDNA and either a pRNA-GFP or a pRNA-mKATE backbone. pRNA vectors

673 were linearised with Ascl, precipitated using EDTA, sodium acetate, and ethanol, then  
674 resuspended in RNase-free water. mRNA was generated from these pRNA vectors *in vitro*  
675 using a T3 mMESSAGE mMACHINE kit (ThermoFisher) and was then purified using an  
676 RNeasy MinElute Cleanup kit (Qiagen). Freshly-laid unfertilised eggs were collected from  
677 apple juice plates within ~1 hour of laying and were dechorionated on double-sided sticky  
678 tape. Eggs were lined up on heptane glue to keep them in place during injections and imaging.  
679 Embryos were dried at 25°C for ~5 mins and covered with immersion oil (Voltalef). mRNA was  
680 manually injected using a syringe into eggs using needles made from borosilicate glass  
681 capillary tubes, at concentrations ranging from ~2-4 µg/µl. Eggs were left for 1.5-2 hours  
682 before imaging to allow for translation of the mRNA. Control eggs were injected with RNAase-  
683 free water.

684

### 685 **Microscopy**

686 Confocal imaging of fixed embryo (and the movies of scaffolds organising microtubules) was  
687 carried out on an Olympus FV3000 scanning inverted confocal system run by FV-OSR  
688 software using a 60X 1.4NA silicone immersion lens (UPLSAPO60xSilicone) or x30 0.95NA  
689 silicone immersion lens (UPLSAPO30xSilicone). Confocal imaging of scaffolds recruiting γ-  
690 TuRC proteins or organising microtubules and of testes samples was carried out on a Zeiss  
691 Axio Observer.Z1 inverted CSU-X1 Yokogawa spinning disk system with 2 ORCA Fusion  
692 camera (Hamamatsu) run by Zeiss Zen2 acquisition software using a 60X 1.4NA oil immersion  
693 lens (Zeiss). Confocal imaging of oocytes was carried out on a Zeiss LSM700 confocal  
694 microscope. Phase contrast microscopy of round spermatids was performed on a Leica DM  
695 IL LED inverted microscope controlled by µManager software and coupled to a RetigaR1  
696 monochrome camera (QImaging) using a 40X 0.55NA air objective (Leica).

697

### 698 **Fertility tests**

699 We tested fertility rates of males and females bred at 25°C, comparing pUbq-Cnn-C<sup>T</sup> males or  
700 females to pUbq-Cnn-C males or females. We quantified the hatching rate of embryos that  
701 were generated when pUbq-Cnn-C or pUbq-Cnn-C<sup>T</sup> males or females were crossed to *w<sup>1118</sup>*  
702 “wild-type” flies. Cages that were sealed with apple juice agar plates with a spot of dried yeast  
703 paste were set up at 25°C containing ~50 newly-hatched test flies (e.g. pUbq-Cnn-C/ -C<sup>T</sup>) and  
704 ~50 newly-hatched wild-type males or virgin females. The apple juice agar plates were  
705 exchanged with fresh plates 2-4 times a day, and the removed plates were kept at 25°C for at  
706 least 25 hours before the proportion of hatched eggs was calculated.

707

708

### 709 **Tissue Culture, Transfection, and IPs from HEK cells**

710 HEK293T cells were grown in high glucose GlutaMAX Dulbecco's modified Eagle medium  
711 (DMEM) supplemented with 10% heat inactivated foetal bovine serum and were incubated at  
712 37°C and 5% CO<sub>2</sub>. Cells were mycoplasma free (LookOut Mycoplasma PCR detection kit,  
713 Sigma). Cells were passaged with 0.05% trypsin-EDTA every 2-3 days. 7x10<sup>6</sup> cells were  
714 seeded and grown for 24 hours before transfection. Cells were transfected with 1.45 µg DNA  
715 using lipofectamine 2000 transfection reagent (ThermoFisher) for 4 hours in OptiMEM  
716 reduced serum medium. A control flask was treated with lipofectamine 2000 in the absence  
717 of any DNA but was otherwise processed identically. The medium was replaced with DMEM,  
718 and cells were allowed to grow for a further 16 hours before harvesting for  
719 immunoprecipitation.

720

721 Transfected cells were washed twice in PBS and lysed in buffer (50 mM HEPES, pH7.5, 150  
722 mM NaCl, 1mM MgCL<sub>2</sub>, 1mM EGTA, 0.5% IGEPAL and protease inhibitors), and rotated for  
723 90 minutes at 4°C. Cells were harvested at 15,000 rpm, 10 mins, 4°C. The supernatant was  
724 mixed with 30 µl GFP-Trap\_MA beads (Chromotek) and rotated overnight at 4°C. Beads were  
725 washed 3 times in ice cold PBST, then resuspended in 50 µl 2x Laemmli sample buffer and  
726 boiled for 10 minutes at 95°C. Western blots were run as described above, using anti-GFP  
727 (1:250) (mouse, Roche) and anti-gamma-Tubulin (1:250) (rabbit, T5192 Sigma) primary  
728 antibodies.

729

### 730 **Image and statistical analysis**

731 All images were processed using Fiji (ImageJ). *Quantifying and comparing the intensity of Cnn*  
732 *and γ-TuRC components at Cnn scaffolds*: Maximum intensity Z-plane projections were made  
733 and a threshold mask was generated using the Cnn channel. Sum fluorescence intensities for  
734 the Cnn and γ-TuRC protein channels were calculated. Overall mean cytosolic background  
735 intensity measurements for each channel were used to "background correct" the sum  
736 intensities for each scaffold. The scaffold intensities within each egg were plotted in Prism and  
737 a weighted linear regression analysis (based on ensuring an even distribution of residuals  
738 across the X axis) was performed. The gradient of the weighted regression line represented  
739 the S value for a given egg. The distribution of the S values per condition were lognormally  
740 distributed and so, to compare mean S values, the log<sub>10</sub> of each individual S value was first  
741 calculated before performing an ANOVA analysis. This was to ensure the data being  
742 compared was normally distributed. Nevertheless, the unadjusted S values were plotted. Note



743 that the fluorescence values and S values are in arbitrary units and cannot be directly  
744 compared between the  $\gamma$ -tubulin-mCherry and Grip75-sfGFP analysis. *Blind analysis of Cnn*  
745 *scaffolds organising microtubules*: Images were blinded ensuring each image had the same  
746 contrast settings. Images were then selected on scaffold size, with eggs containing small or  
747 very large scaffolds removed. The remaining images were then scored by eye as being of  
748 eggs that contained scaffolds with either no asters, weak or strong asters, or scaffolds where  
749 the Jupiter-mCherry signal did not extend beyond the GFP-Cnn signal (overlay). *Blind analysis*  
750 *of pUbq-Cnn-C or pUbq-Cnn-C<sup>T</sup> embryos*: Images were blinded ensuring each image had the  
751 same contrast settings. Embryos were then scored by eye as being either normal or having  
752 moderate or severe defects. Embryos were scored as normal even when one or two mitotic  
753 figures had defects, because this is quite common in syncytial embryos and does not prevent  
754 development. Embryos were scored as having moderate defects when an unusually high  
755 proportion of mitotic figures had defects, or where the overall organisation of the spindles was  
756 moderately abnormal. Embryos were scored as having severe defects when there was either  
757 massive disorder with individual mitotic figures or overall organisation, or both. *To quantify*  
758 *western blot bands*: the sum intensities of bands were background corrected using mean  
759 “background” values at positions on the gel with no apparent signal. To reduce variation, the  
760 band intensities were taken using the freehand tool to draw closely around the perimeter of  
761 the band. For the Co-IP experiments, the intensities of the  $\gamma$ -tubulin IP bands were normalised  
762 to the intensity of the  $\gamma$ -tubulin band in the MBP-Cnn-T-N IP within each experiment.  
763 GraphPad Prism 7 or 8 was used for all statistical analysis and graph production.

764

## 765 **Bioinformatics**

766 Protein alignments were produced using JalView. Secondary structure predictions were  
767 performed using JPred 4.

768

769

## 770 **Acknowledgements**

771 This research was supported by a Wellcome Trust and Royal Society Sir Henry Dale  
772 fellowship awarded to PTC [105653/Z/14/Z], by IdEx Université de Paris ANR-18-IDEX-0001,  
773 by a Glover Fund research fellowship (Clare College/Dept. of Biochemistry, University of  
774 Cambridge) awarded to CAT, by an Association pour la Recherche sur le Cancer grant (PJA  
775 20181208148) awarded to AG, and by the CNRS. We thank Jordan Raff for sharing Cnn  
776 antibodies and plasmids, Berthold Hedwig and Steve Rogers for help with needle pulling, Jens  
777 Lüders for sharing the pCMV-GFP vector, and Matt Castle for guidance on statistical analysis

778 of Cnn scaffolds. We thank other members of the Conduit lab for their invaluable input and  
779 critical reading of the manuscript. The work benefited from the Imaging Facility, Department  
780 of Zoology, University of Cambridge, supported by Matt Wayland and a Sir Isaac Newton Trust  
781 Research Grant (18.07ii(c)), from the ImagoSeine at the IJM, Paris, and from use of the  
782 Cambridge Centre for Proteomics Core Facility. For the purpose of Open Access, the author  
783 has applied a CC BY public copyright license to any Author Accepted Manuscript version  
784 arising from this submission.

785

786

## 787 **Author Contributions**

788 PTC and CAT designed the study and wrote the manuscript. CAT carried out cloning for all  
789 experiments and performed the *in vitro* recruitment assays, fertility tests, and round spermatid  
790 analysis. CT and PTC performed the mRNA injection experiments and analysed the scaffold  
791 data. PTC carried out the embryo analysis. AE helped establish the mRNA assay. AG  
792 performed the oocyte analysis and analysed the data. FB and AG generated the  $\gamma$ -tubulin-  
793 mCherry fly line via InDroso. MDR prepared bacterial cultures and assisted with protein  
794 purification.

795

796

## 797 **References**

798

799 Brilot, A., A. Lyon, A. Zelter, S. Viswanath, A. Maxwell, M.J. MacCoss, E.G. Muller, A. Sali, T.N.  
800 Davis, and D.A. Agard. 2019. CM1-driven assembly and activation of Yeast  $\gamma$ -Tubulin Small  
801 Complex underlies microtubule nucleation. *BioRxiv*. doi:10.1101/2020.11.21.392803.

802 Chen, J.V., R.A. Buchwalter, L.-R. Kao, and T.L. Megraw. 2017. A Splice Variant of Centrosomin  
803 Converts Mitochondria to Microtubule-Organizing Centers. *Curr Biol*. 27:1928–1940.e6.  
804 doi:10.1016/j.cub.2017.05.090.

805 Choi, Y.-K., P. Liu, S.K. Sze, C. Dai, and R.Z. Qi. 2010. CDK5RAP2 stimulates microtubule nucleation  
806 by the  $\gamma$ -tubulin ring complex. *J Cell Biology*. 191:1089–1095. doi:10.1083/jcb.201007030.

807 Conduit, P.T., Z. Feng, J.H. Richens, J. Baumbach, A. Wainman, S.D. Bakshi, J. Dobbelaere, S.  
808 Johnson, S.M. Lea, and J.W. Raff. 2014a. The centrosome-specific phosphorylation of Cnn by



- 809 Polo/Plk1 drives Cnn scaffold assembly and centrosome maturation. *Dev Cell*. 28:659-669.  
810 doi:10.1016/j.devcel.2014.02.013.
- 811 Conduit, P.T., J.H. Richens, A. Wainman, J. Holder, C.C. Vicente, M.B. Pratt, C.I. Dix, Z.A. Novak,  
812 I.M. Dobbie, L. Schermelleh, and J.W. Raff. 2014b. A molecular mechanism of mitotic centrosome  
813 assembly in *Drosophila*. *Elife*. 3:2987. doi:10.7554/elife.03399.
- 814 Consolati, T., J. Locke, J. Roostalu, Z.A. Chen, J. Gannon, J. Asthana, W.M. Lim, F. Martino, M.A.  
815 Cvetkovic, J. Rappsilber, A. Costa, and T. Surrey. 2020. Microtubule Nucleation Properties of  
816 Single Human  $\gamma$ TuRCs Explained by Their Cryo-EM Structure. *Dev Cell*.  
817 doi:10.1016/j.devcel.2020.04.019.
- 818 Cota, R.R., N. Teixidó-Travesa, A. Ezquerro, S. Eibes, C. Lacasa, J. Roig, and J. Lüders. 2017. MZT1  
819 regulates microtubule nucleation by linking  $\gamma$ TuRC assembly to adapter-mediated targeting and  
820 activation. *J Cell Sci*. 130:jcs.195321. doi:10.1242/jcs.195321.
- 821 Eisman, R.C., M.A.S. Phelps, and T. Kaufman. 2015. An Amino-Terminal Polo Kinase Interaction  
822 Motif Acts in the Regulation of Centrosome Formation and Reveals a Novel Function for  
823 centrosomin (cnn) in *Drosophila*. *Genetics*. 201:685-706. doi:10.1534/genetics.115.181842.
- 824 Eisman, R.C., M.A.S. Phelps, and T.C. Kaufman. 2009. Centrosomin: a complex mix of long and short  
825 isoforms is required for centrosome function during early development in *Drosophila melanogaster*.  
826 *Genetics*. 182:979-997. doi:10.1534/genetics.109.103887.
- 827 Farache, D., L. Emorine, L. Haren, and A. Merdes. 2018. Assembly and regulation of  $\gamma$ -tubulin  
828 complexes. *Open Biol*. 8:170266. doi:10.1098/rsob.170266.
- 829 Feng, Z., A. Caballe, A. Wainman, S. Johnson, A.F.M. Haensele, M.A. Cottee, P.T. Conduit, S.M. Lea,  
830 and J.W. Raff. 2017. Structural Basis for Mitotic Centrosome Assembly in Flies. *Cell*. 169:1078  
831 1089.e13. doi:10.1016/j.cell.2017.05.030.
- 832 Flor-Parra, I., A.B. Iglesias-Romero, and F. Chang. 2018. The XMAP215 Ortholog Alp14 Promotes  
833 Microtubule Nucleation in Fission Yeast. *Curr Biol*. 28:1681-1691.e4.  
834 doi:10.1016/j.cub.2018.04.008.
- 835 Gunzelmann, J., D. Rüdnick, T. Lin, W. Zhang, A. Neuner, U. Jäkle, and E. Schiebel. 2018. The  
836 microtubule polymerase Stu2 promotes oligomerization of the  $\gamma$ -TuSC for cytoplasmic microtubule  
837 nucleation. *Elife*. 7:934. doi:10.7554/elife.39932.

- 838 Hanafusa, H., S. Kedashiro, M. Tezuka, M. Funatsu, S. Usami, F. Toyoshima, and K. Matsumoto. 2015.  
839 PLK1-dependent activation of LRRK1 regulates spindle orientation by phosphorylating  
840 CDK5RAP2. *Nat Cell Biol.* 17:1024–1035. doi:10.1038/ncb3204.
- 841 Hutchins, J.R.A., Y. Toyoda, B. Hegemann, I. Poser, J.-K. Hériché, M.M. Sykora, M. Augsburg, O.  
842 Hudecz, B.A. Buschhorn, J. Bulkescher, C. Conrad, D. Comartin, A. Schleiffer, M. Sarov, A.  
843 Pozniakovsky, M.M. Slabicki, S. Schloissnig, I. Steinmacher, M. Leuschner, A. Ssykor, S. Lawo,  
844 L. Pelletier, H. Stark, K. Nasmyth, J. Ellenberg, R. Durbin, F. Buchholz, K. Mechtler, A.A. Hyman,  
845 and J.-M. Peters. 2010. Systematic Analysis of Human Protein Complexes Identifies Chromosome  
846 Segregation Proteins. *Science.* 328:593–599. doi:10.1126/science.1181348.
- 847 Kollman, J.M., C.H. Greenberg, S. Li, M. Moritz, A. Zelter, K.K. Fong, J.-J. Fernandez, A. Sali, J.  
848 Kilmartin, T.N. Davis, and D.A. Agard. 2015. Ring closure activates yeast  $\gamma$ TuRC for species-  
849 specific microtubule nucleation. *Nat Struct Mol Biol.* 22:132–137. doi:10.1038/nsmb.2953.
- 850 Kollman, J.M., A. Merdes, L. Mourey, and D.A. Agard. 2011. Microtubule nucleation by  $\gamma$ -tubulin  
851 complexes. *Nat Rev Mol Cell Bio.* 12:709–721. doi:10.1038/nrm3209.
- 852 Lin, T., A. Neuner, and E. Schiebel. 2014a. Targeting of  $\gamma$ -tubulin complexes to microtubule organizing  
853 centers: conservation and divergence. *Trends Cell Biol.* 25:296–307. doi:10.1016/j.tcb.2014.12.002.
- 854 Lin, T., A. Neuner, Y.T. Schlosser, E. Schiebel, A.N. Scharf, and L. Weber. 2014b. Cell-cycle  
855 dependent phosphorylation of yeast pericentrin regulates  $\gamma$ -TuSC-mediated microtubule nucleation.  
856 *Elife.* 3:e02208. doi:10.7554/elifesciences.02208.
- 857 Liu, P., Y.-K. Choi, and R.Z. Qi. 2014. NME7 is a functional component of the  $\gamma$ -tubulin ring complex.  
858 *Mol Biol Cell.* 25:2017–2025. doi:10.1091/mbc.e13-06-0339.
- 859 Liu, P., E. Zupa, A. Neuner, A. Böhrer, J. Loerke, D. Flemming, T. Ruppert, T. Rudack, C. Peter, C.  
860 Spahn, O.J. Gruss, S. Pfeffer, and E. Schiebel. 2019. Insights into the assembly and activation of the  
861 microtubule nucleator  $\gamma$ -TuRC. *Nature.* 1–8. doi:10.1038/s41586-019-1896-6.
- 862 Lynch, E.M., L.M. Grocock, W.E. Borek, and K.E. Sawin. 2014. Activation of the  $\gamma$ -Tubulin Complex  
863 by the Mto1/2 Complex. *Curr Biol.* 24:896–903. doi:10.1016/j.cub.2014.03.006.
- 864 Mukherjee, A., P.S. Brooks, F. Bernard, A. Guichet, and P.T. Conduit. 2020. Microtubules originate  
865 asymmetrically at the somatic Golgi and are guided via Kinesin2 to maintain polarity in neurons.  
866 *Elife.* 9:e58943. doi:10.7554/elifesciences.58943.

- 867 Muroyama, A., L. Seldin, and T. Lechler. 2016. Divergent regulation of functionally distinct  $\gamma$ -tubulin  
868 complexes during differentiation. *J Cell Biology*. 213:679–692. doi:10.1083/jcb.201601099.
- 869 Nithianantham, S., B.D. Cook, M. Beans, F. Guo, F. Chang, and J. Al-Bassam. 2018. Structural basis  
870 of tubulin recruitment and assembly by microtubule polymerases with Tumor Overexpressed Gene  
871 (TOG) domain arrays. *Elife*. 7:e38922. doi:10.7554/elife.38922.
- 872 Oegema, K., C. Wiese, O.C. Martin, R.A. Milligan, A. Iwamatsu, T.J. Mitchison, and Y. Zheng. 1999.  
873 Characterization of two related *Drosophila* gamma-tubulin complexes that differ in their ability to  
874 nucleate microtubules. *The Journal of cell biology*. 144:721–733.
- 875 Ohta, M., Z. Zhao, D. Wu, S. Wang, J.L. Harrison, J.S. Gómez-Cavazos, A. Desai, and K.F. Oegema.  
876 2021. Polo-like kinase 1 independently controls microtubule-nucleating capacity and size of the  
877 centrosome. *J Cell Biol*. 220. doi:10.1083/jcb.202009083.
- 878 Petry, S., and R.D. Vale. 2015. Microtubule nucleation at the centrosome and beyond. *Nat Cell Biol*.  
879 17:1089–1093. doi:10.1038/ncb3220.
- 880 Pinyol, R., J. Scrofani, and I. Vernos. 2013. The role of NEDD1 phosphorylation by Aurora A in  
881 chromosomal microtubule nucleation and spindle function. *Curr Biol*. 23:143–149.  
882 doi:10.1016/j.cub.2012.11.046.
- 883 Roostalu, J., N.I. Cade, and T. Surrey. 2015. Complementary activities of TPX2 and chTOG constitute  
884 an efficient importin-regulated microtubule nucleation module. *Nat Cell Biol*. 17:1422–1434.  
885 doi:10.1038/ncb3241.
- 886 Sanchez, A.D., and J.L. Feldman. 2016. Microtubule-organizing centers: from the centrosome to non-  
887 centrosomal sites. *Curr Opin Cell Biol*. 44:93–101. doi:10.1016/j.cub.2016.09.003.
- 888 Sawin, K.E., P.C.C. Lourenço, and H.A. Snaith. 2004. Microtubule nucleation at non-spindle pole body  
889 microtubule-organizing centers requires fission yeast centrosomin-related protein mod20p. *Curr*  
890 *Biol*. 14:763–775. doi:10.1016/j.cub.2004.03.042.
- 891 Scrofani, J., T. Sardon, S. Meunier, and I. Vernos. 2015. Microtubule nucleation in mitosis by a  
892 RanGTP-dependent protein complex. *Curr Biol*. 25:131–140. doi:10.1016/j.cub.2014.11.025.
- 893 Tariq, A., L. Green, J.C.G. Jaynes, C. Soeller, and J.G. Wakefield. 2020. In vitro reconstitution of  
894 branching microtubule nucleation. *Elife*. 9:e49769. doi:10.7554/elife.49769.

- 895 Teixidó-Travesa, N., J. Roig, and J. Lüders. 2012. The where, when and how of microtubule nucleation  
896 - one ring to rule them all. *J Cell Sci.* 125:4445-4456. doi:10.1242/jcs.106971.
- 897 Thawani, A., R.S. Kadzik, and S. Petry. 2018. XMAP215 is a microtubule nucleation factor that  
898 functions synergistically with the  $\gamma$ -tubulin ring complex. *Nat Cell Biol.* 20:1-18.  
899 doi:10.1038/s41556-018-0091-6.
- 900 Thawani, A., M.J. Rale, N. Coudray, G. Bhabha, H.A. Stone, J.W. Shaevitz, and S. Petry. 2020. The  
901 transition state and regulation of  $\gamma$ -TuRC-mediated microtubule nucleation revealed by single  
902 molecule microscopy. *Elife.* 9:e54253. doi:10.7554/elife.54253.
- 903 Tillery, M., C. Blake-Hedges, Y. Zheng, R. Buchwalter, and T. Megraw. 2018. Centrosomal and Non-  
904 Centrosomal Microtubule-Organizing Centers (MTOCs) in *Drosophila melanogaster*. *Cells.* 7:121.  
905 doi:10.3390/cells7090121.
- 906 Tovey, C.A., and P.T. Conduit. 2018. Microtubule nucleation by  $\gamma$ -tubulin complexes and beyond.  
907 *Essays Biochem.* 91:EBC20180028. doi:10.1042/ebc20180028.
- 908 Tovey, C.A., C.E. Tubman, E. Hamrud, Z. Zhu, A.E. Dyas, A.N. Butterfield, A. Fyfe, E. Johnson, and  
909 P.T. Conduit. 2018.  $\gamma$ -TuRC Heterogeneity Revealed by Analysis of Mozart1. *Curr Biol.* 28:2314-  
910 2323.e6. doi:10.1016/j.cub.2018.05.044.
- 911 Wieczorek, M., S. Bechstedt, S. Chaaban, and G.J. Brouhard. 2015. Microtubule-associated proteins  
912 control the kinetics of microtubule nucleation. *Nat Cell Biol.* 17:907-916. doi:10.1038/ncb3188.
- 913 Wieczorek, M., L. Urnavicius, S.-C. Ti, K.R. Molloy, B.T. Chait, and T.M. Kapoor. 2019. Asymmetric  
914 Molecular Architecture of the Human  $\gamma$ -Tubulin Ring Complex. *Cell.*  
915 doi:10.1016/j.cell.2019.12.007.
- 916 Woodruff, J.B., B.F. Gomes, P.O. Widlund, J. Mahamid, A. Honigmann, and A.A. Hyman. 2017. The  
917 Centrosome Is a Selective Condensate that Nucleates Microtubules by Concentrating Tubulin. *Cell.*  
918 169:1066-1077.e10. doi:10.1016/j.cell.2017.05.028.
- 919 Zhang, J., and T.L. Megraw. 2007. Proper recruitment of gamma-tubulin and D-TACC/Msps to  
920 embryonic *Drosophila* centrosomes requires Centrosomin Motif 1. *Mol Biol Cell.* 18:4037-4049.  
921 doi:10.1091/mbc.e07-05-0474.

922

923

## 924 **Figure Legends**

925

### 926 **Figure 1**

#### 927 **The extreme N-terminal region of Cnn-C inhibits binding to $\gamma$ -tubulin complexes. (A)**

928 Diagram of the centrosomal Cnn (Cnn-C) and testes-specific Cnn (Cnn-T) isoforms that exist  
929 *in vivo*. **(B)** Diagram of artificial Cnn proteins with differing N-terminal regions used to form

930 Cnn scaffolds (induced by phospho-mimetic mutations in the PReM domain (beige)) via  
931 mRNA injection into unfertilised eggs. **(C-F)** Fluorescence images of unfertilised eggs

932 expressing  $\gamma$ -tubulin37C-mCherry that were injected with mRNA encoding different types of  
933 artificial Cnn protein, as indicated. Insets show representative examples of individual

934 scaffolds. **(G)** Graph showing fluorescence intensity measurements (in arbitrary units) of  $\gamma$ -  
935 tubulin37C-mCherry and GFP-Cnn at Cnn-C (n= 1498 scaffolds; 12 eggs), Cnn-T (n= 1400

936 scaffolds; 10 eggs), Cnn-C $\Delta^{1-77}$  (n= 2168 scaffolds; 10 eggs), or Cnn-C $\Delta^{1-97}$  (n= 400 scaffolds;  
937 7 eggs) scaffolds. Each dot represents a single scaffold. **(H)** Graph shows slope values of

938 linear regression lines calculated for scaffolds of different types. Each slope value represents  
939 an individual egg that contained multiple scaffolds. The geometric mean and 95% CIs are

940 indicated. P values are from comparisons to the Cnn-C mean using a one-way ANOVA of  
941 log<sub>10</sub> transformed data. **(I,J)** Western blot of a co-IP experiment (I) and quantification of  $\gamma$ -

942 tubulin bands (J) showing the efficiency with which different MBP-tagged N-terminal fragments  
943 of Cnn, as indicated, co-IP  $\gamma$ -tubulin from embryo extracts.  $\gamma$ -tubulin band intensities were

944 normalised within each of 3 experimental repeats to the  $\gamma$ -tubulin band in the respective MBP-  
945 Cnn-T-N IP.

946

### 947 **Figure 2**

#### 948 **The $\gamma$ -TuRC-specific protein Grip75<sup>GCP4</sup> is recruited strongly to Cnn-T and Cnn-C $\Delta^{1-77}$**

949 **scaffolds.** Fluorescence images **(A-C)** show mKATE-Cnn scaffolds of different types, as  
950 indicated, within eggs expressing endogenously-tagged Grip75<sup>GCP4</sup>-sfGFP. Insets in show

951 representative examples of individual scaffolds. **(D)** Graph showing fluorescence intensity  
952 measurements (in arbitrary units) of Grip75<sup>GCP4</sup>-sfGFP and mKATE-Cnn at Cnn-C (n= 1920

953 scaffolds; 12 eggs), Cnn-T (n= 1650 scaffolds; 10 eggs) or Cnn-C $\Delta^{1-77}$  (n= 2599 scaffolds; 10  
954 eggs). Each dot represents a single scaffold. **(E)** Graph shows slope values of linear

955 regression lines calculated for scaffolds of different types. Each slope value represents an  
956 individual egg that contained multiple scaffolds. The mean and 95% CIs are indicated. P

957 values are from comparisons to the Cnn-C mean using a one-way ANOVA.

958

959 **Figure 3**

960 **Cnn-T and Cnn-C<sup>Δ1-77</sup> scaffolds organise microtubules more robustly than Cnn-C**  
961 **scaffolds. (A-C)** Fluorescence images of Cnn-C scaffolds (A), Cnn-T scaffolds (B), or Cnn-  
962 C<sup>Δ1-77</sup> scaffolds (C) within eggs expressing the microtubule marker Jupiter-mCherry. (D) Bar-  
963 graph showing results of a blind categorisation of eggs containing the different scaffold types  
964 based on the ability of the scaffolds within each egg to organise microtubule asters (numbers  
965 of eggs analysed indicated above). (E,F) Fluorescence images showing that adjacent Cnn-T  
966 (E) or Cnn-C<sup>Δ1-77</sup> (F) scaffolds can organise spindle-like structures.

967

968 **Figure 4**

969 **Phospho-mimetic mutations within the CAI domain and downstream of the CM1 domain**  
970 **promote binding to  $\gamma$ -tubulin complexes. (A)** A cartoon showing the N-terminal region (aa1-  
971 255) of Cnn used in co-IP experiments. Regions of potential phosphorylation sites are  
972 indicated, with their amino acid sequence displayed. (B-F) Western blots of a co-IP  
973 experiments (B,C,E) and quantification of  $\gamma$ -tubulin bands (D,F) showing the efficiency to  
974 which different MBP-tagged N-terminal fragments of Cnn, as indicated, co-IP  $\gamma$ -tubulin from  
975 extracts of wild-type embryo (B-F), or  $\gamma$ -tubulin (top panels in E) and Grip75<sup>GCP4</sup>-sfGFP  
976 (bottom panels in E) from extracts of Grip75<sup>GCP4</sup>-sfGFP-expressing embryos. In (D) and (F),  
977 band intensities were normalised within each experiment to the  $\gamma$ -tubulin band in the  
978 respective MBP-Cnn-T-N IP. The connecting lines indicate data points obtained from within  
979 the same experiment. P values are from comparisons to the Cnn-C mean using either  
980 Wilcoxon matched-pairs signed rank tests (D, n=9 for comparison with Cnn-C-N<sup>T27</sup>; n=5 for  
981 comparison with Cnn-C-N<sup>P1</sup>) or a Dunn's multiple comparisons test (F, n=4). (G,H) Graphs  
982 showing the S values from eggs expressing either  $\gamma$ -tubulin-mCherry (G) or Grip75<sup>GCP4</sup>-sfGFP  
983 (H) which contain the indicated scaffold types. Note that the data for Cnn-C, Cnn-T, and Cnn-  
984 C<sup>Δ1-77</sup> scaffolds is the same as in Figures 1H and 2E to allow comparisons with the phospho-  
985 mimetic scaffolds. In (G) n= 2650 scaffolds and 11 eggs for Cnn-C<sup>T27</sup> scaffolds, 1803 scaffolds  
986 and 11 eggs for Cnn-C<sup>T186</sup> scaffolds, 2482 scaffolds and 10 eggs for Cnn-C<sup>T173</sup> scaffolds, and  
987 2835 scaffolds and 18 eggs for Cnn-C<sup>T27,S186</sup> scaffolds. In (H) n= 1448 scaffolds and 10 eggs  
988 for Cnn-C<sup>T27</sup> scaffolds, 1074 scaffolds and 10 eggs for Cnn-C<sup>T186</sup> scaffolds, and 943 scaffolds  
989 and 10 eggs for Cnn-C<sup>T27,S186</sup> scaffolds. The geometric mean and 95% CIs are indicated. \*\*  
990 indicates p<0.01, n.s. indicates p>0.05. P values were from comparisons to the Cnn-C mean  
991 using a one-way ANOVA of log<sub>10</sub> transformed data. (I) Bar-graph showing results of a blind  
992 categorisation of eggs containing the different scaffold types based on the ability of the  
993 scaffolds within each egg to organise microtubule asters (numbers of eggs analysed indicated



994 above). Note that the data for Cnn-C, Cnn-T, and Cnn-C<sup>A1-77</sup> scaffolds is the same as in Figure  
995 3D to allow comparisons with the phospho-mimetic scaffolds.

996

#### 997 **Figure 5**

998 **Expression of pUbq-Cnn-C<sup>T</sup>, which ectopically binds  $\gamma$ -TuRCs, reduces the ability of**  
999 **flies to generate progeny. (A)** Diagram of normal Cnn-C and chimeric Cnn-C<sup>T</sup> in which the  
1000 CAI domain of Cnn-C (dark blue) is replaced by the shorter N-terminus of Cnn-T (red). **(B)**  
1001 Graph showing the proportion of embryos that hatched from crosses of wild type flies to 0-1-  
1002 or 1-2-week old pUbq-Cnn-C or pUbq-Cnn-C<sup>T</sup> males or females, as indicated. Means and 95%  
1003 confidence intervals are indicated. Total numbers of embryos counted and number of counts  
1004 are indicated below. **(C)** Western blots of protein extracts from embryos and testes of wild-  
1005 type (WT), pUbq-Cnn-C, and pUbq-Cnn-C<sup>T</sup> flies, as indicated. Blots were probed with anti- $\gamma$ -  
1006 tubulin, anti-Cnn-C (N-term), anti-Cnn-C (C-term), and anti-Cnn-T<sup>N</sup> antibodies as indicated.  
1007 Note that endogenous Cnn-C (black arrowheads) runs at the same height as pUbq-Cnn-C  
1008 (blue arrowheads) on these blots, explaining the increased brightness of these bands in the  
1009 pUbq-Cnn-C extract lanes. Note also that the C-terminal Cnn-C antibody recognises an  
1010 unspecific band (asterisks) of approximately the same size as pUbq-Cnn-C<sup>T</sup> (red arrowheads)  
1011 and thus the pUbq-Cnn-C<sup>T</sup> band intensity would be lower in the absence of this unspecific  
1012 band. **(D)** Western blot showing co-IP of  $\gamma$ -tubulin via anti-Cnn antibodies from embryo  
1013 extracts expressing either pUbq-Cnn-C or pUbq-Cnn-C<sup>T</sup>, as indicated. Red arrowhead  
1014 indicates Cnn-C<sup>T</sup>. Note that, given the low expression of pUbq-Cnn-C<sup>T</sup> within embryos, gel  
1015 loading of the IP lanes was adjusted to better balance the amount of Cnn protein per lane.

1016

#### 1017 **Figure 6**

1018 **Expression of pUbq-Cnn-C<sup>T</sup> increases the frequency of nuclear and spindle defects**  
1019 **observed within syncytial embryos. (A-F)** Fluorescence images of syncytial embryos  
1020 expressing either pUbq-Cnn-C (A-C) or pUbq-Cnn-C<sup>T</sup> (D-F) in either S-phase/prophase (A,D)  
1021 Metaphase (B,E), or telophase (C,F). Note the apparent high density of cytosolic microtubules  
1022 that can be (but are not always) observed in pUbq-Cnn-C<sup>T</sup> embryos, along with major  
1023 organisation defects. **(G)** Graph showing results from a blind categorisation of wild-type  
1024 (n=49), pUbq-Cnn-C (n=88), or pUbq-Cnn-C<sup>T</sup> (n=36) embryos based on the presence or  
1025 absence of moderate or severe nuclear or spindle defects.

1026

#### 1027 **Figure 7**

1028 **Expression of pUbq-Cnn-C<sup>T</sup> results in major defects during male meiosis. (A,B)** Phase  
1029 contrast images showing round spermatids from testes of flies expressing pUbq-Cnn-C (A) or  
1030 pUbq-Cnn-C<sup>T</sup> (B). Alterations in nucleus: nebenkern ratio (normally 1:1, asterisks in right  
1031 panel) and size (normally approximately equal) indicate defects in cytokinesis and  
1032 karyokinesis. **(C)** Graph showing quantification of the nucleus:nebenkern ratio (left panel -  
1033 means and standard deviations indicated) and variance in nuclear diameter (right panel –  
1034 geometric means and 95% CIs indicated, p value from an unpaired t-test of log<sub>10</sub>-transformed  
1035 data) in pUbq-Cnn-C (n=22 cysts) and pUbq-Cnn-C<sup>T</sup> (n=27 cysts) testes. **(D,E)** Fluorescence  
1036 images showing spermatocytes or round spermatids at different developmental stages, as  
1037 indicated, from testes of flies expressing pUbq-Cnn-C (D) or pUbq-Cnn-C<sup>T</sup> (E) stained for  
1038 microtubules (green,  $\alpha$ -tubulin), centrosomes (pink, Asterless), and DNA (blue). Defects within  
1039 cells expressing pUbq-Cnn-C<sup>T</sup> include an apparent high density of cytosolic microtubules,  
1040 abnormal spindles, and too many nuclei.

1041

#### 1042 **Figure 8**

1043 **The region downstream of the CM1 domain in human CDK5RAP2 is inhibitory for**  
1044 **binding to  $\gamma$ -TuRCs. (A)** Cartoon depicting the various CDK5RAP2 N-terminal fragments  
1045 used in IP experiments and indicating their relative  $\gamma$ -TuRC binding affinity. **(B,C)** Western  
1046 blots of co-IP experiments from HEK cell extracts probed for the various GFP-tagged  
1047 CDK5RAP2 fragments (top) and  $\gamma$ -tubulin (bottom).

1048



## 1049 **Supplementary Figure Legends**

1050

### 1051 **Figure S1**

1052 **Diagrams of different Cnn constructs (omitting the tags) used in this study. (A)** Diagram  
1053 showing full-length Cnn constructs without modifications to the PReM domain. Cnn-T is the  
1054 testes-specific isoform in *Drosophila*. Cnn-C is the major centrosomal isoform in *Drosophila*.  
1055 Cnn-C<sup>T</sup> represents an artificial form of Cnn-C in which the N-terminal region of Cnn-C (dark  
1056 blue) has been replaced with the N-terminal region of Cnn-T (red). **(B)** Diagram showing Cnn  
1057 constructs used in the scaffold assay, where Cnn-C contains phospho-mimetic mutations in  
1058 the PReM domain to drive scaffold formation *in vivo*. **(C)** Diagram showing bacterially-purified  
1059 N-terminal fragments of different Cnn types used in co-IP experiments.

1060

### 1061 **Figure S2**

1062 **Bacterially-purified MBP-Cnn-T-N fragments immunoprecipitate  $\gamma$ -Tubulin Ring**  
1063 **Complexes. (A)** Western blot showing results of anti-MBP immunoprecipitation from embryo  
1064 extracts expressing GFP-tagged Grip proteins (homologues of GCP4,5,6), either  
1065 supplemented (+) or not supplemented (-) with MBP-Cnn-T-N, as indicated. Blots were probed  
1066 with anti-GFP, anti-Grip71 and anti- $\gamma$ -tubulin antibodies as indicated. When using MBP-Cnn-  
1067 T-N,  $\gamma$ -tubulin and Grip71, as well as Grip75, 128, or 163, are co-immunoprecipitated. **(B)**  
1068 Mass spectrometry results from IPs with MBP-Cnn-T-N showing the presence of various  $\gamma$ -  
1069 TuRC components. Note that Mzt1 is not expressed within embryos. Results of a control  
1070 experiment on Grip75-GFP embryo extract not supplemented with any MBP-Cnn-T-N  
1071 fragment are also shown. Numbers indicate emPAI scores as a proxy for protein abundance.  
1072 Grip84 (A) and Grip84 (E) represent two different isoforms of Grip84 (promoters 1 and 2  
1073 respectively).

1074

### 1075 **Figure S3**

1076 **Protein alignments of N-terminal regions of CM1 domain proteins. (A)** An alignment of  
1077 Cnn-C homologues from different *Drosophila* species. The alignment was carried out in  
1078 JalView keeping *D. melanogaster* at the top with the closest related species in order below.  
1079 Only the N-terminal regions of the proteins were used in the alignment (~1-255aa). Potential  
1080 phosphorylation patches are highlighted in yellow, with the proportion of S/T residues present  
1081 in the *Drosophila melanogaster* sequence indicated in brackets. The CM1 domain is  
1082 highlighted in purple. Red boxes and green arrows indicate  $\alpha$ -helices and  $\beta$ -sheets based on  
1083 predictions from JPred. **(B)** An alignment of the N-terminal region of Cnn-C with the equivalent

1084 N-terminal regions of its homologues in non-*Drosophila* species. Phosphorylation sites that  
1085 promote binding to  $\gamma$ -TuRCs identified either in this study (*Drosophila* Cnn-C, T<sup>27</sup> and S<sup>186</sup>) or  
1086 other studies (*S. cerevisiae* S<sup>36</sup>, S<sup>60</sup>, T<sup>64</sup>, T<sup>68</sup> and S<sup>91</sup>, *C. elegans* SPD-5, T<sup>178</sup>, T<sup>198</sup>; human  
1087 CDK5RAP2, S<sup>140</sup>) are indicated. Note that only the originally identified CM1 domain sequence  
1088 (yellow) is conserved between homologues. The position of the “CM1 helix” (blue) and “CM1  
1089 coiled coil (CC) region” (brown) recently identified in SPC110 are indicated, as is the  $\gamma$ -TuNA  
1090 sequence from human CDK5RAP2 (green).

1091

#### 1092 **Figure S4**

1093 **Polarity is established normally in pUbq-Cnn-C<sup>T</sup> oocytes. (A-B)** Fluorescence images  
1094 show localisation of Staufen protein in oocytes expressing pUbq-Cnn-C (A) or pUbq-Cnn-C<sup>T</sup>  
1095 (B) at stages 8, 9 and 10, as indicated. Staufen localised in the centre of the oocyte at stage  
1096 8 and then at the posterior in stage 9 and 10 in all pUbq-Cnn-C (n=35, stage 8; n=35, stage  
1097 9; n=30, stage 10) and all pUbq-Cnn-C<sup>T</sup> (n=40, stage 8; n=50, stage 9; n=40, stage 10)  
1098 oocytes that were imaged. **(C)** Fluorescence images show localisation of Gurken protein in  
1099 oocytes expressing pUbq-Cnn-C or pUbq-Cnn-C<sup>T</sup> at stage 9. Gurken protein was positioned  
1100 close to the nucleus in the dorsal corner in all pUbq-Cnn-C (n=30) and all pUbq-Cnn-C<sup>T</sup> (n=35)  
1101 stage 9 oocytes. Gurken mis-positioning or its absence results in abnormal dorsal appendages  
1102 that protrude from the surface of the egg, but the dorsal appendages were normal on all pUbq-  
1103 Cnn-C (n=724) and all pUbq-Cnn-C<sup>T</sup> (n=488) eggs.

1104

#### 1105 **Figure S5**

##### 1106 **Major spermatocyte defects are observed within testes from pUbq-Cnn-C<sup>T</sup> flies**

1107 **(A,B)** Fluorescence images showing spermatocytes at different developmental stages (as  
1108 indicated) from flies expressing either pUbq-Cnn-C (A) or pUbq-Cnn-C<sup>T</sup> (B) fixed and stained  
1109 for microtubules (green,  $\alpha$ -tubulin), centrosomes (pink, Asterless), and DNA (blue). A high  
1110 density of cytosolic microtubules, as well as cytokinesis and karyokinesis defects, are clearly  
1111 observed in cells from pUbq-Cnn-C<sup>T</sup> testes.

1112

#### 1113 **Supplementary Videos**

##### 1114 **Video 1**

1115 **Cnn-T scaffolds organise microtubule asters and can be mobile.** Movie showing Cnn-T  
1116 scaffolds (green) organising microtubule asters (marked with Jupiter-mCherry (magenta)). A  
1117 mobile scaffold (lower left) with an asymmetric microtubule aster can be seen moving through  
1118 the cytosol.

1119

1120 **Video 2**

1121 **Transient spindle-like structures can form between Cnn scaffolds.** Movie showing the  
1122 formation and disappearance of a transient spindle-like structure between adjacent Cnn-T  
1123 scaffolds (green). Microtubules are marked with Jupiter-mCherry (magenta).

1124

1125 **Video 3**

1126 **Spindle-like structures organised by Cnn scaffolds can form in synchrony.** Movie  
1127 showing the synchronous formation and disappearance of a multi-polar spindle-like array of  
1128 microtubules that is subsequently organised by a nearby group of coalescing Cnn scaffolds  
1129 (green). Microtubules are marked with Jupiter-mCherry (magenta)

1130

1131 **Video 4**

1132 **Microtubules are robustly anchored to Cnn scaffolds.** Movie showing rare giant Cnn-T  
1133 scaffolds (green). One scaffold can be seen rotating and dragging the microtubules, indicating  
1134 that the microtubules are robustly attached to the scaffold, presumably via  $\gamma$ -TuRCs.  
1135 Microtubules are marked with Jupiter-mCherry (magenta).

1136

1137 **Video 5**

1138 **Expression of GFP-Cnn-T-N leads to the formation of dynamic microtubules within the**  
1139 **cytosol of unfertilised eggs.** Video shows the effect of injecting mRNA encoding GFP-Cnn-  
1140 T-N into unfertilised eggs expressing Jupiter-mCherry (marker of microtubules). Left panel  
1141 shows the GFP channel (green), centre panel shows the RFP channel (magenta), right panel  
1142 shows a merge.

1143

# Figure 1

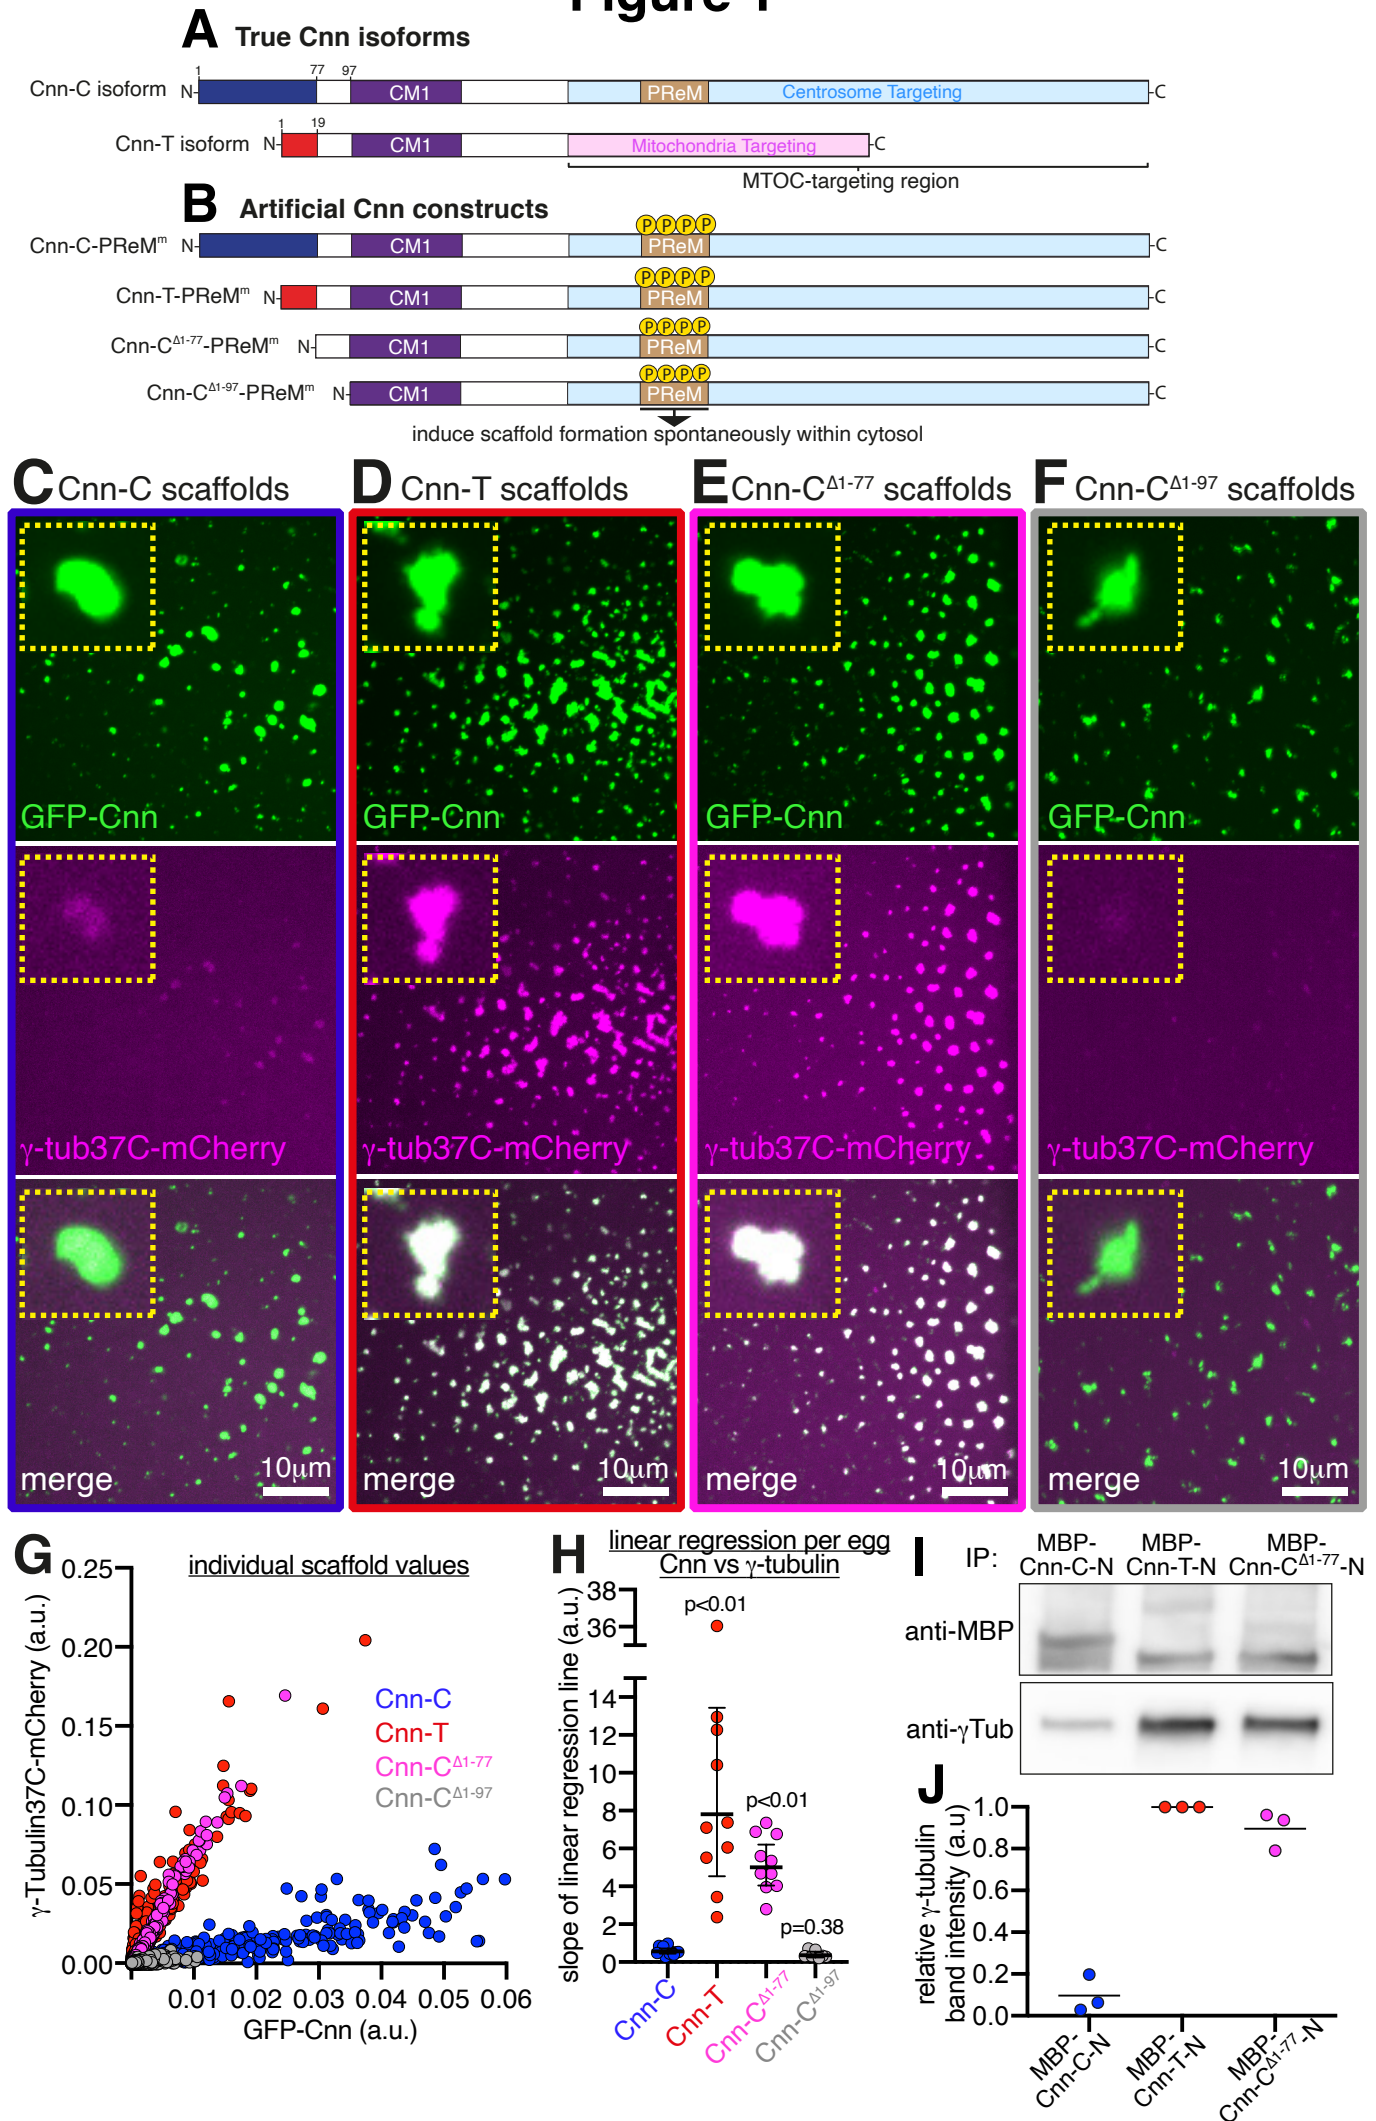



## Figure 2

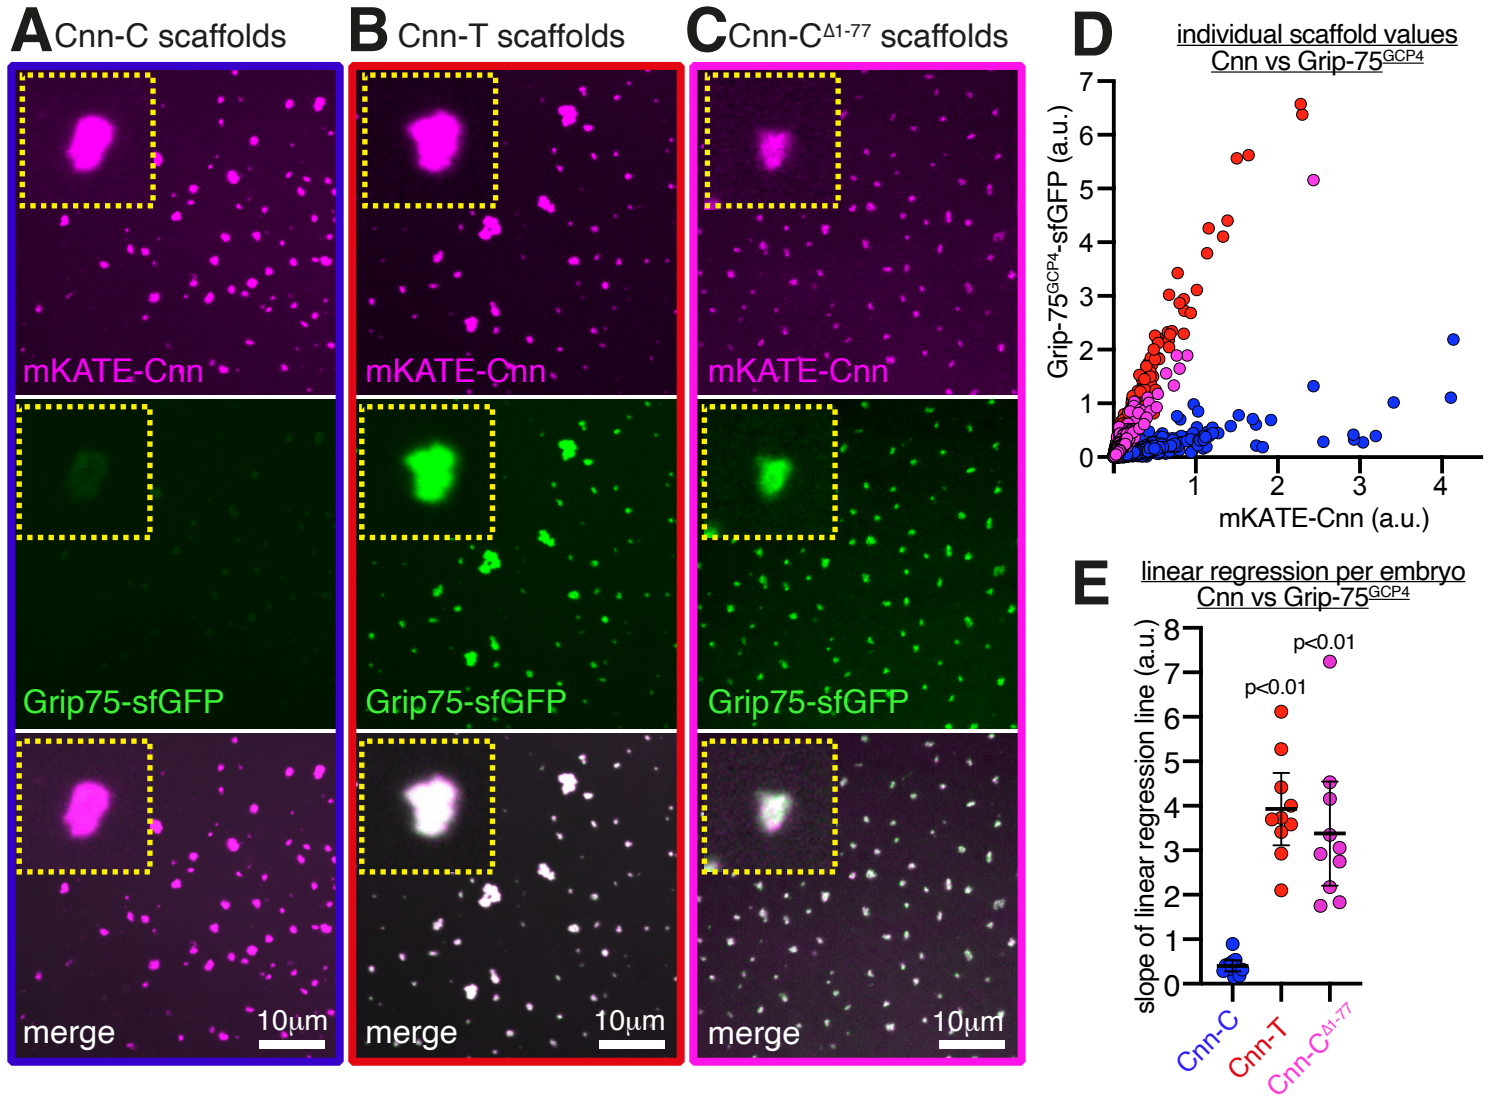

## Figure 3

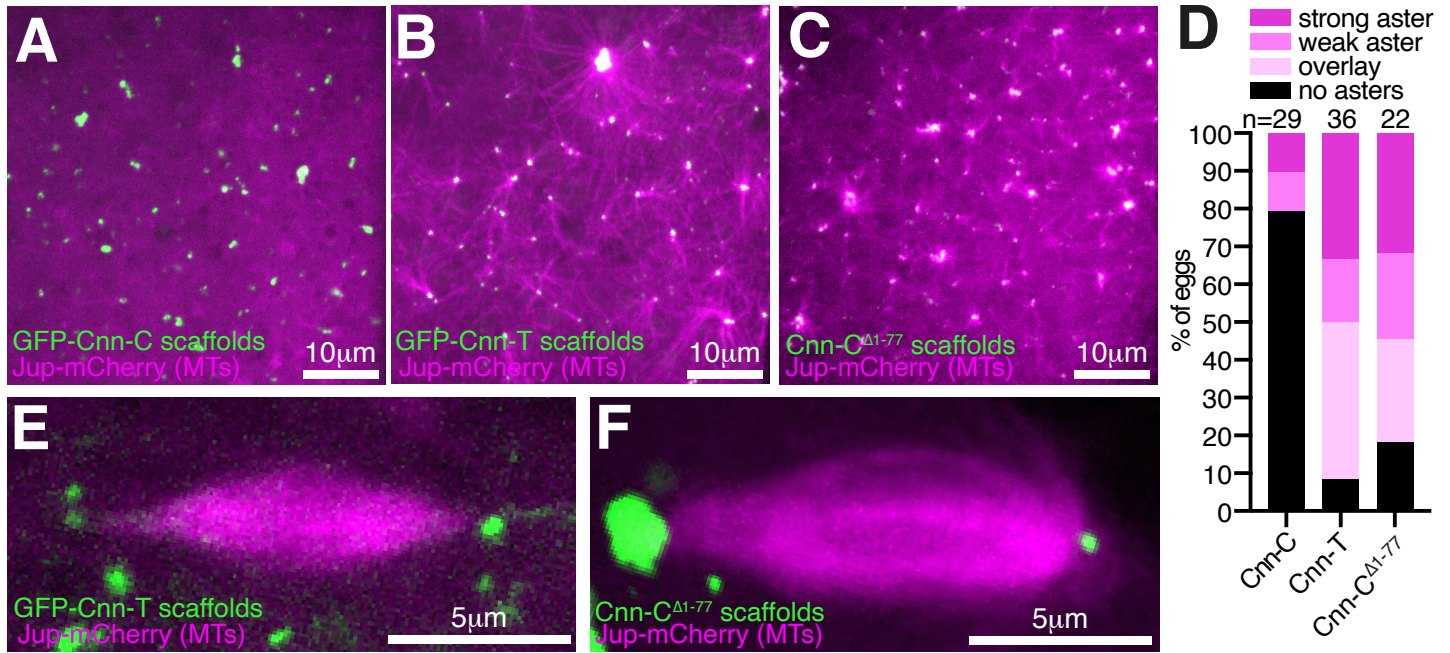

## Figure 4

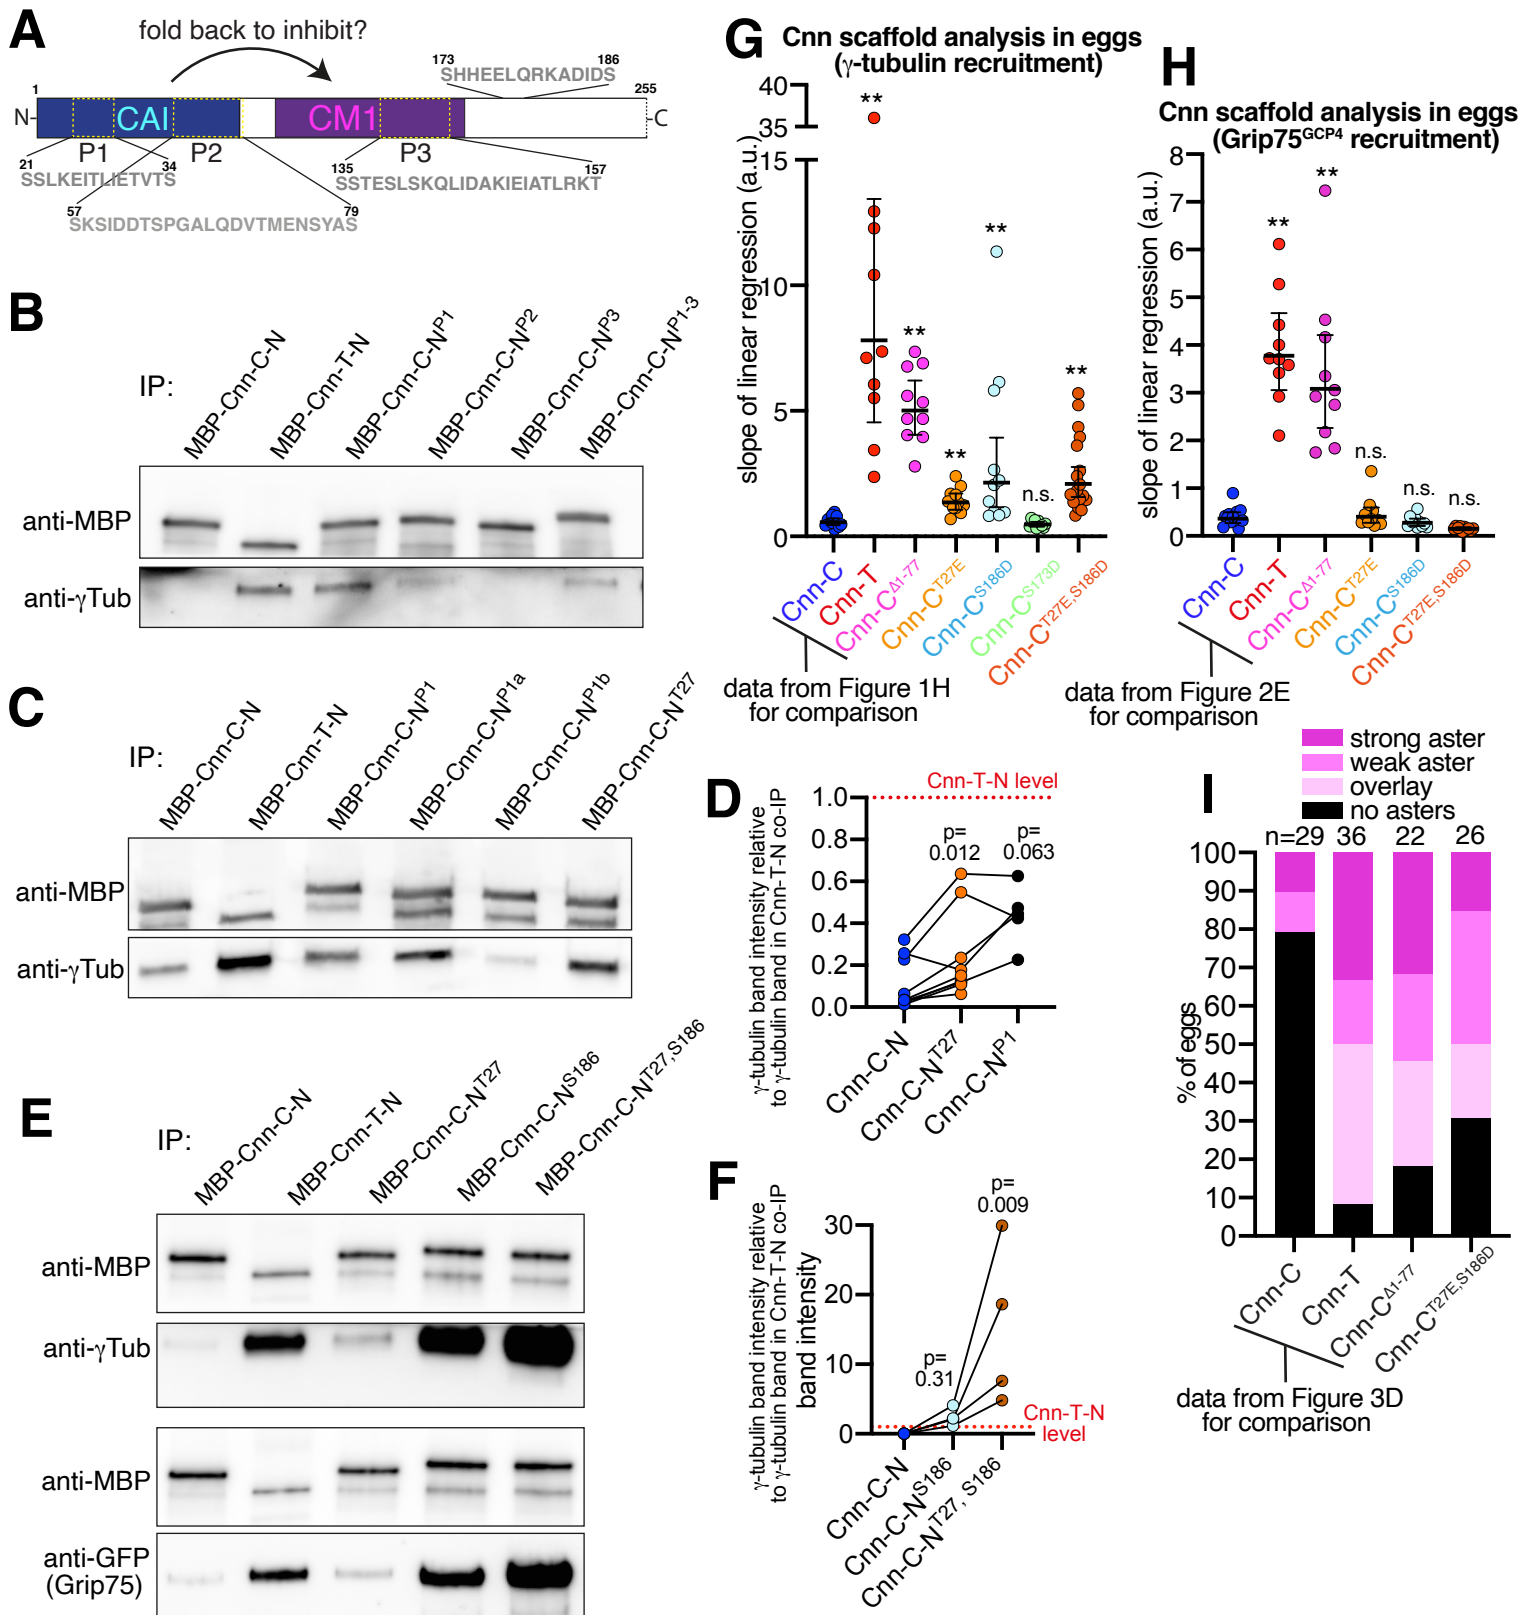

## Figure 5

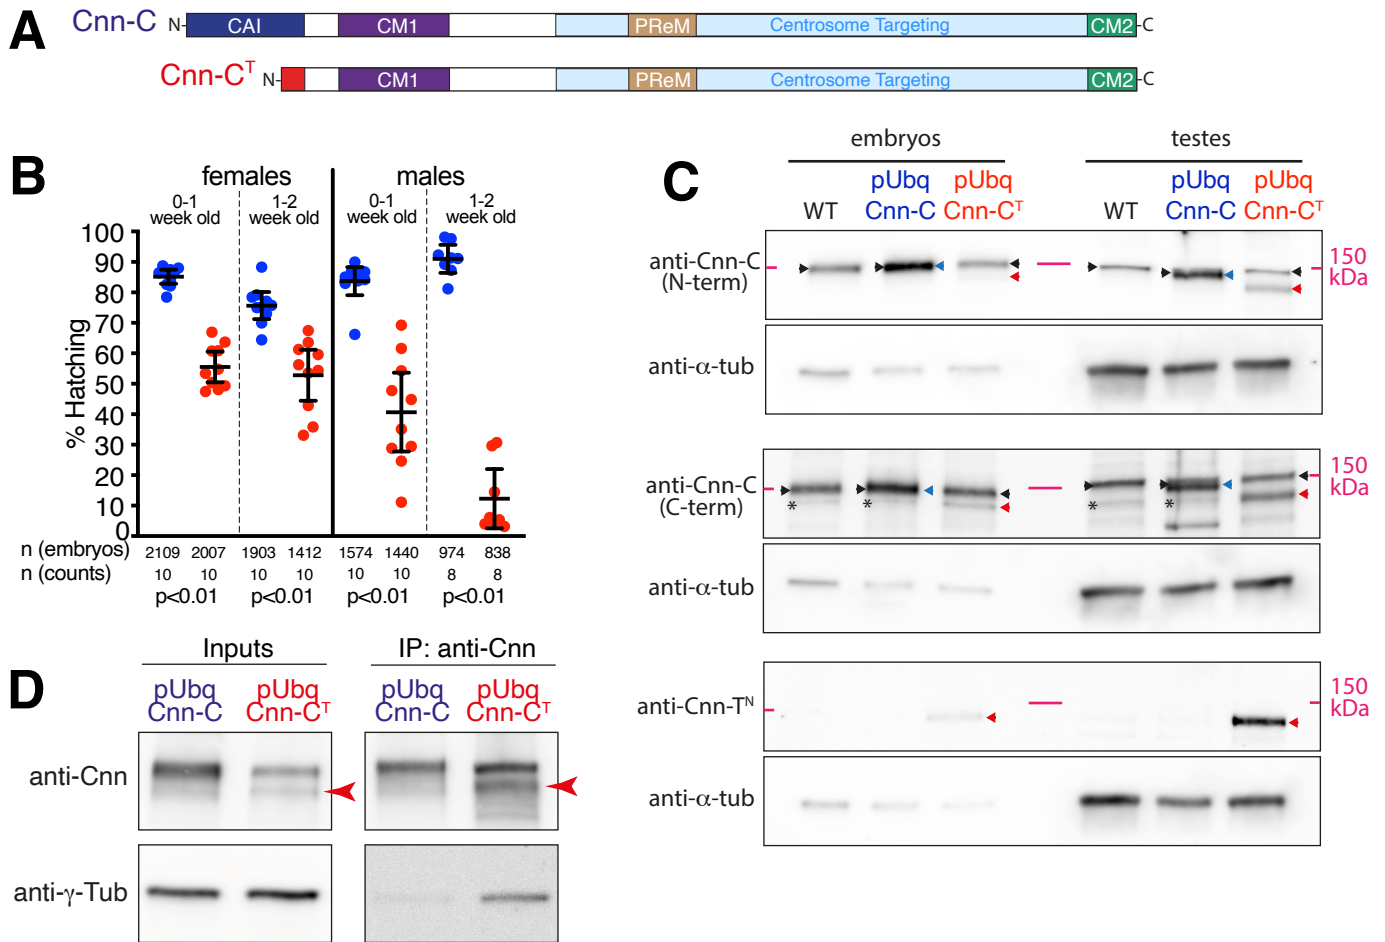



## Figure 6

pUbq-Cnn-C

pUbq-Cnn-C<sup>T</sup>

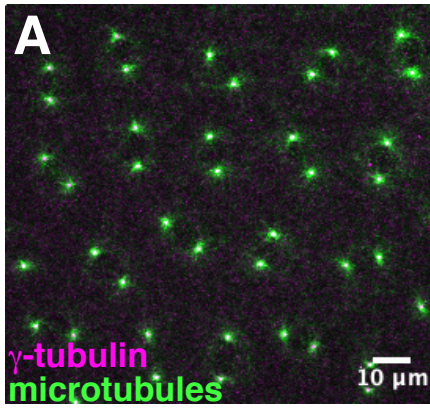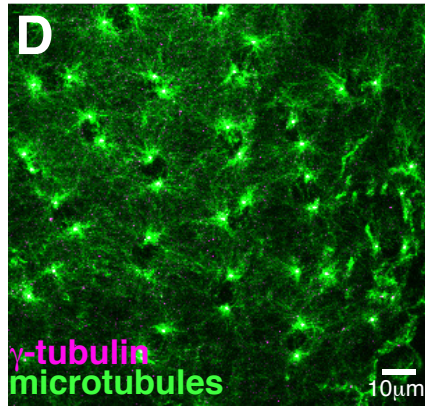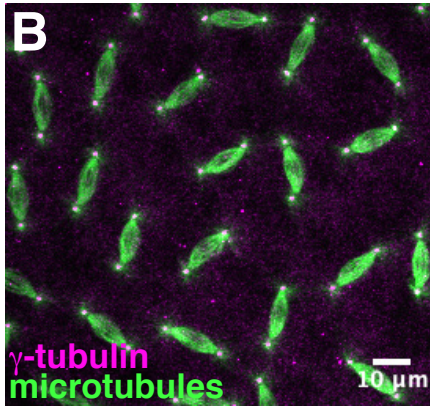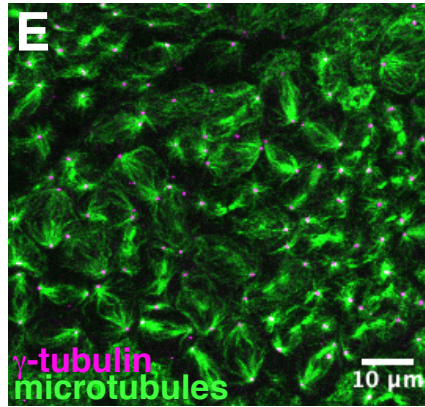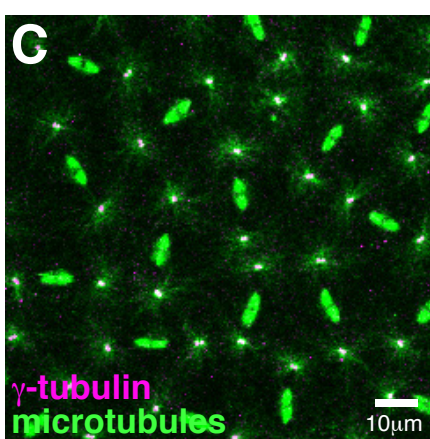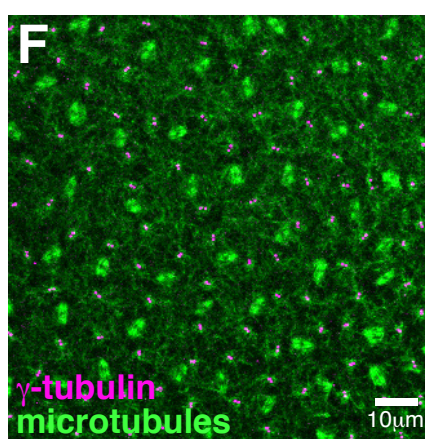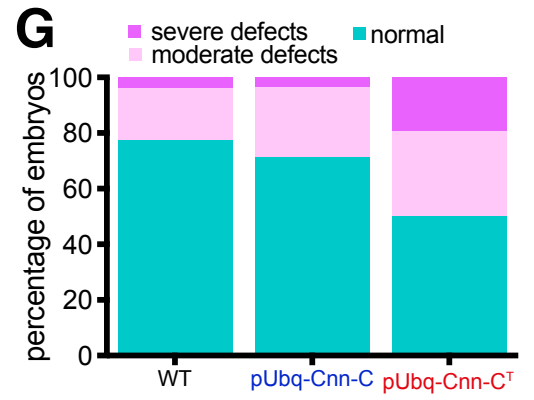

## Figure 7

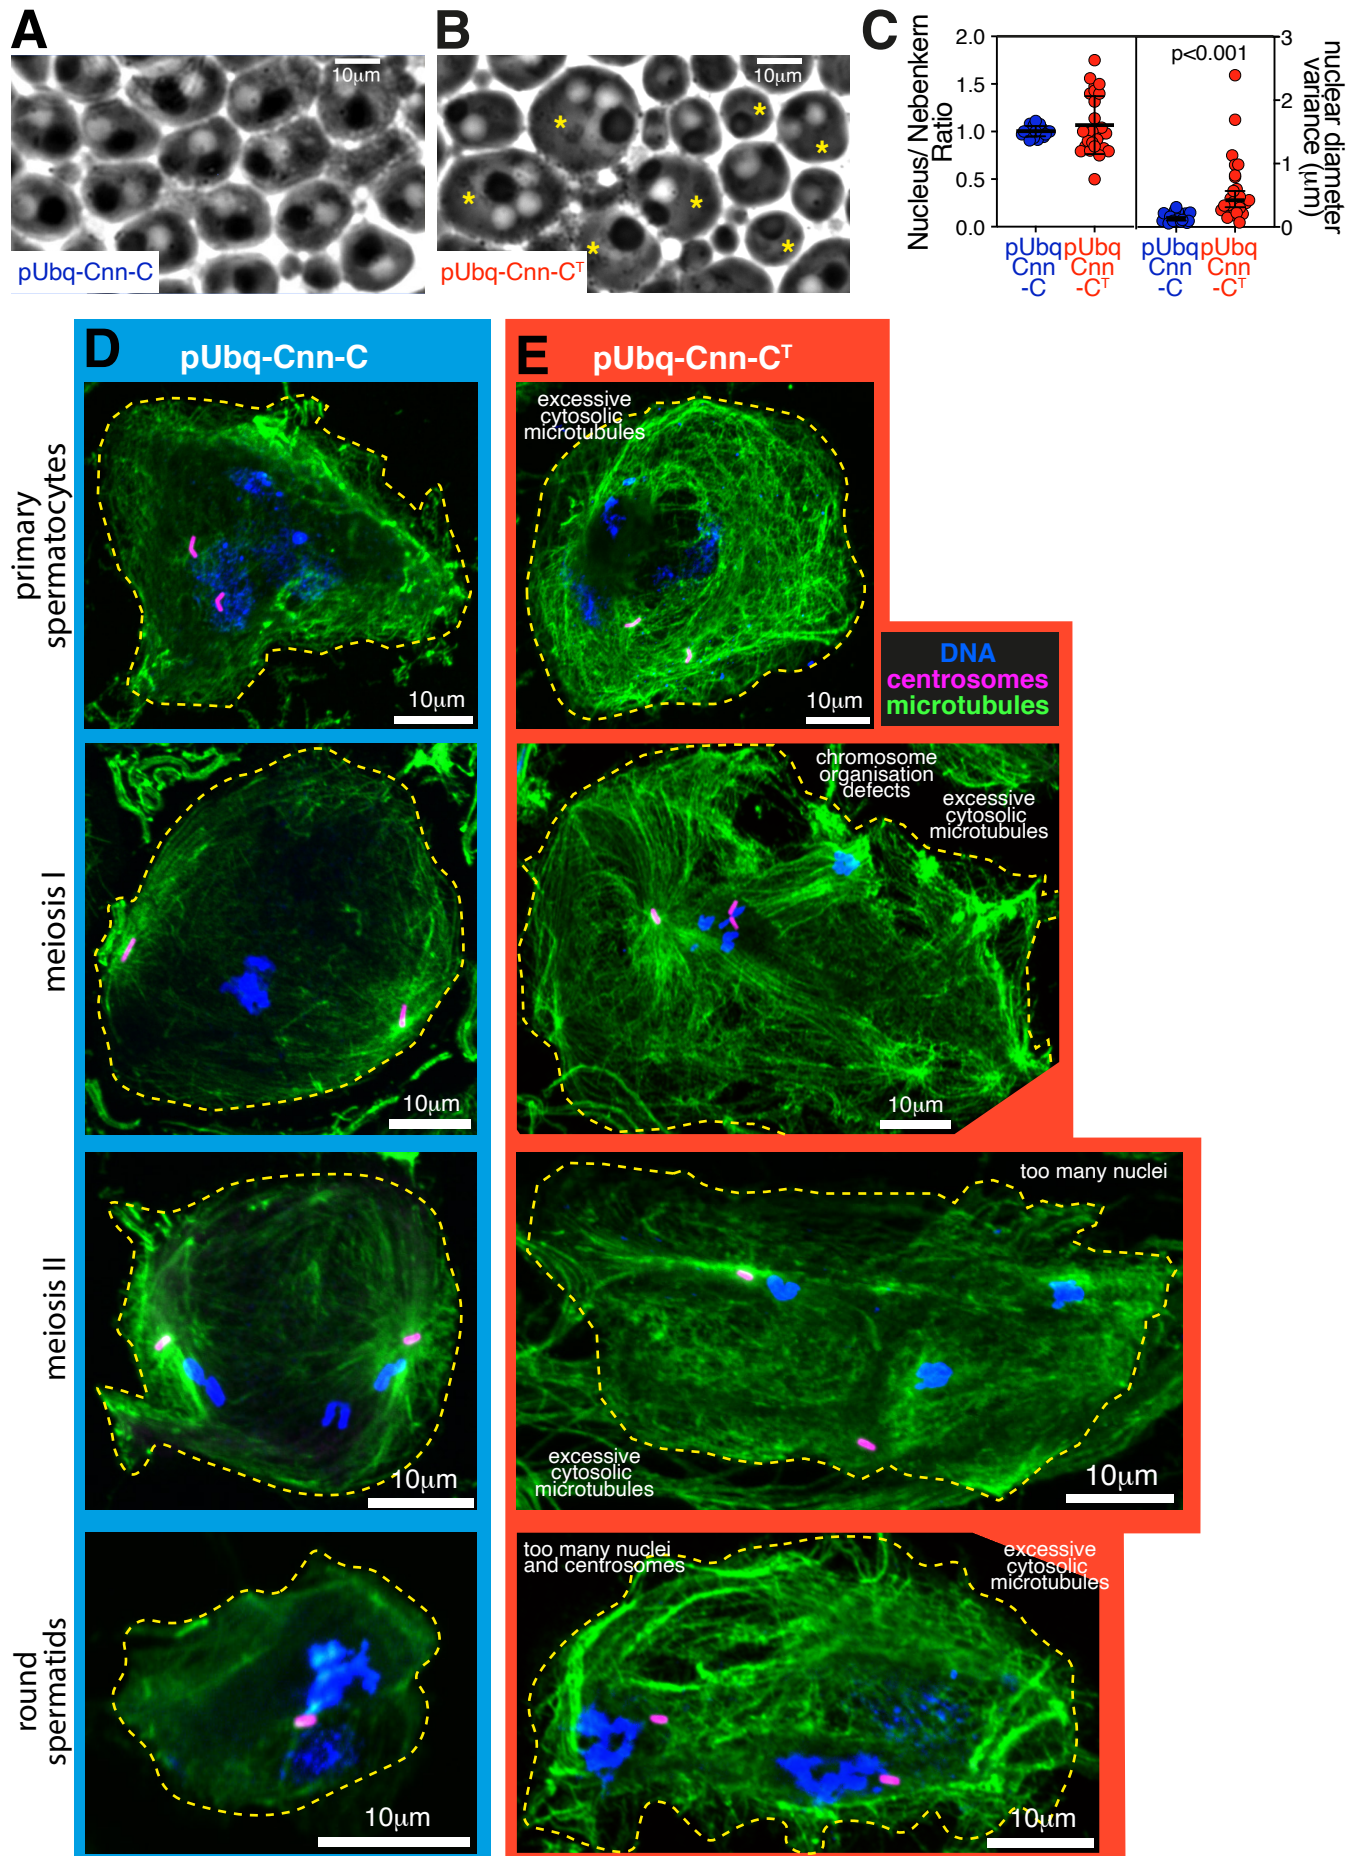



## Figure 8

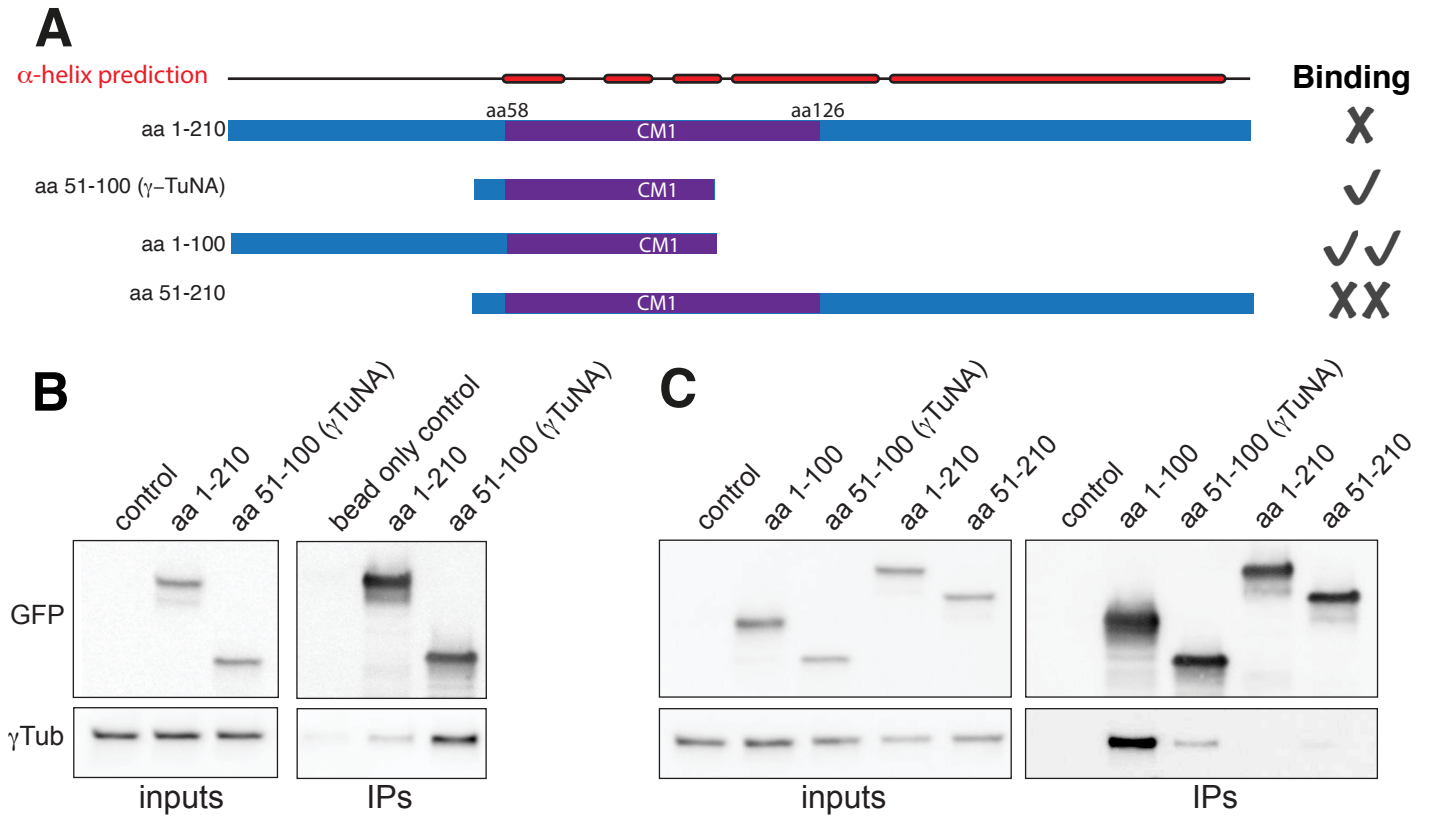

# Figure S1

**A**

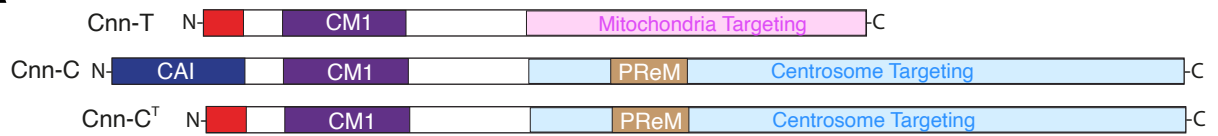

**B**

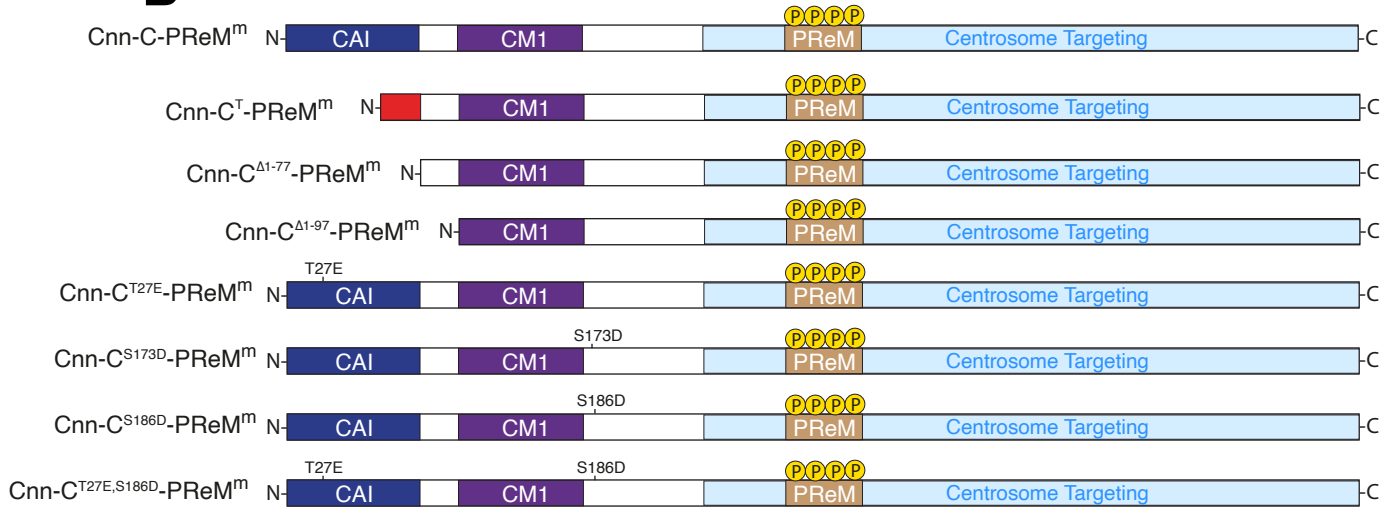

**C**

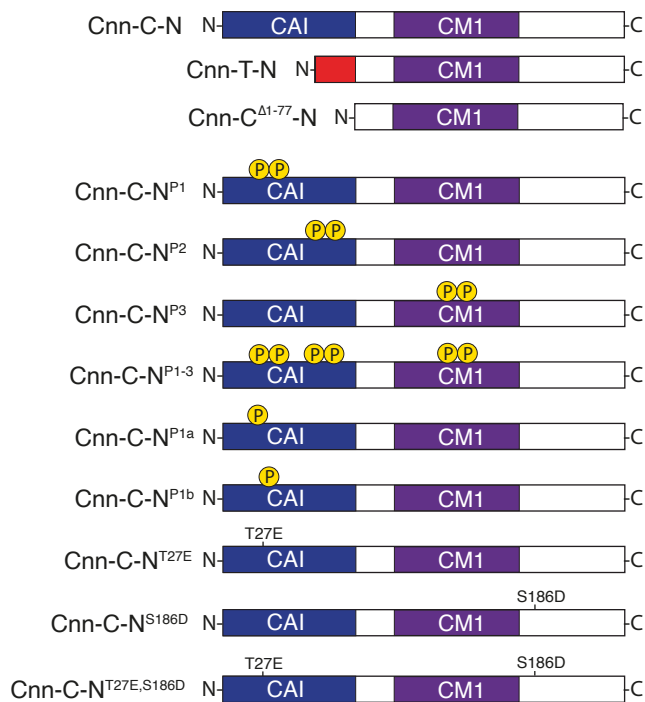

## Figure S2

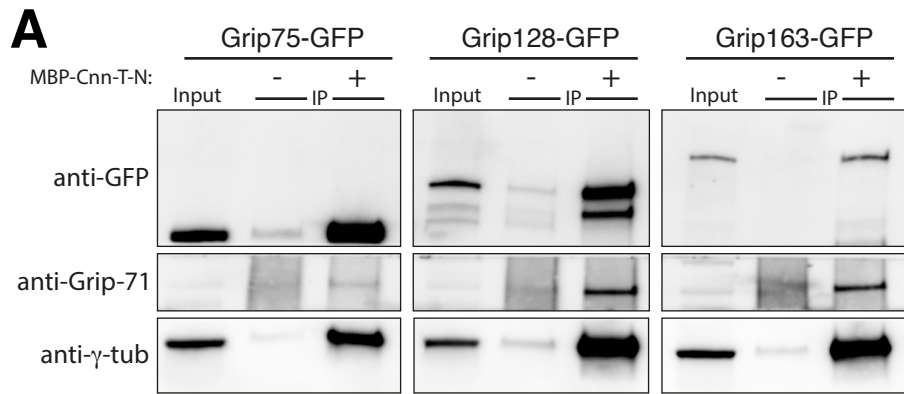

## B

| UniProt entry | Protein                       | G75, no fragment | G75 + Cnn-T-N | G128 + Cnn-T-N | G163 + Cnn-T-N |
|---------------|-------------------------------|------------------|---------------|----------------|----------------|
| A0A0B4K6Z9    | <b>Cnn</b>                    | -                | 4.50          | 15.63          | 13.03          |
| M9PDN9        | $\gamma$ - <b>tubulin 37C</b> | 0.45             | 24.45         | 63.16          | 39.41          |
| P23257        | $\gamma$ - <b>tubulin 23C</b> | -                | 1.04          | 1.90           | 1.43           |
| E1JJQ3        | <b>Grip84</b>                 | -                | 1.76          | 8.14           | 4.76           |
| Q8IQW7        | <b>Grip84</b>                 | -                | 1.54          | 7.44           | -              |
| Q9XYP8        | <b>Grip91</b>                 | -                | 1.74          | 4.45           | 3.54           |
| Q9VKU7        | <b>Grip75</b>                 | 0.07             | 0.88          | 3.57           | 2.54           |
| Q9VXU8        | <b>Grip128</b>                | -                | 0.08          | 0.40           | 0.16           |
| Q9VTS3        | <b>Grip163</b>                | -                | 0.24          | 1.09           | 0.24           |
| Q9VJ57        | <b>Grip71</b>                 | -                | 0.30          | 1.87           | 0.93           |
| X2JCP8        | <b>Actin</b>                  | 40.63            | 17.87         | 22.66          | 32.21          |

# Figure S3

## A alignment of Cnn-C N-terminal region between *Drosophila* species

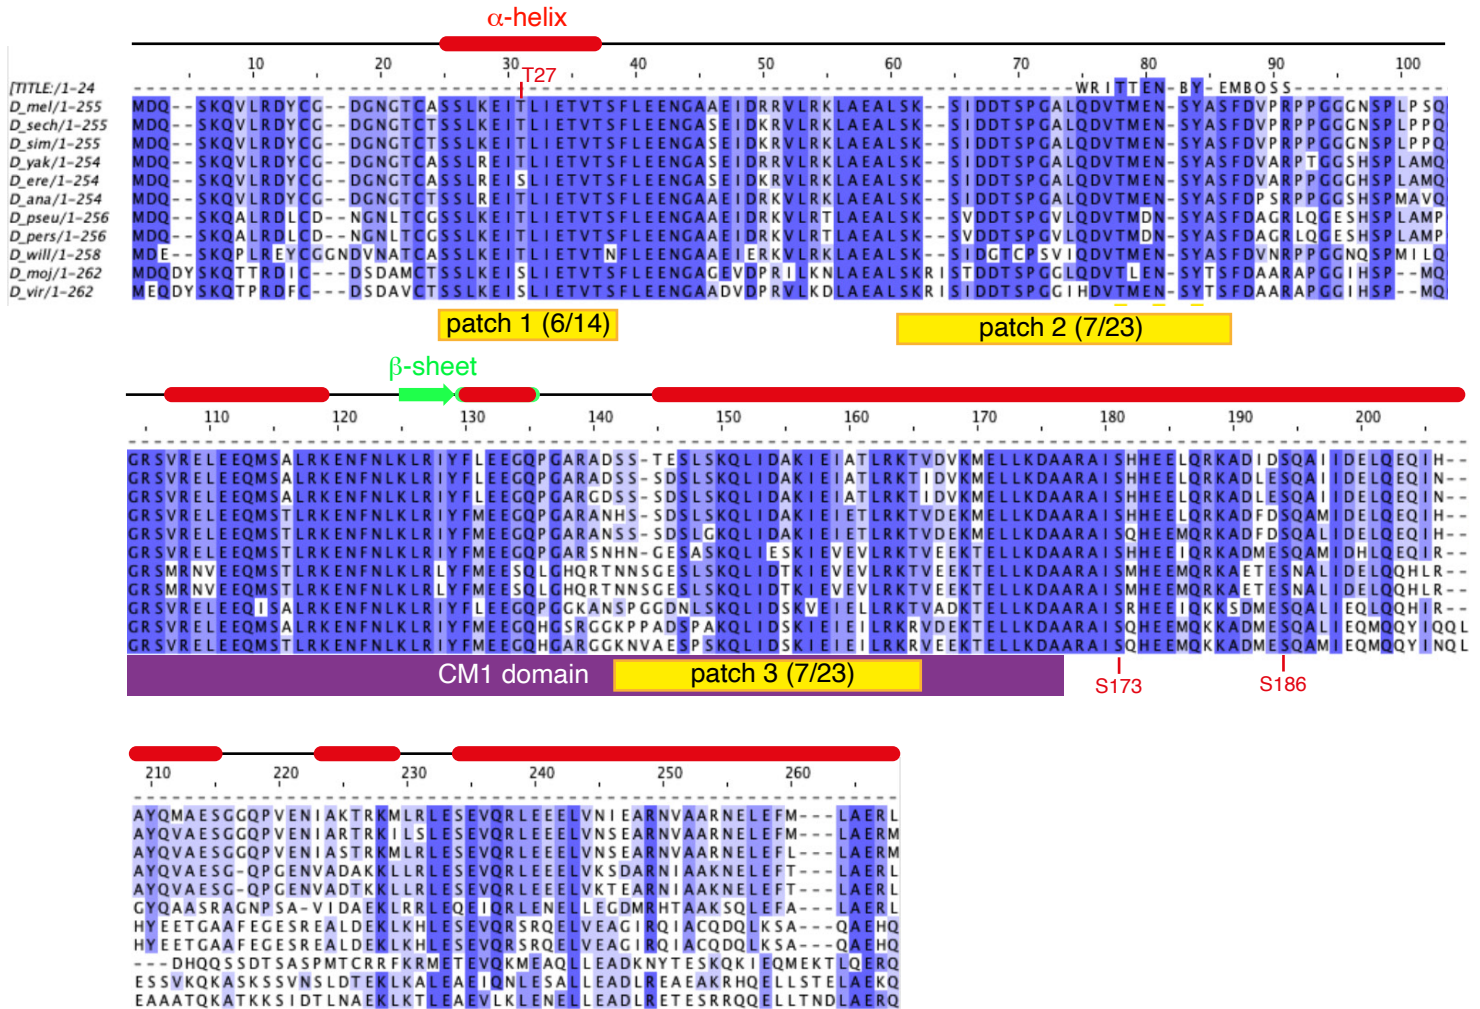

## B alignment of N-terminal region between species

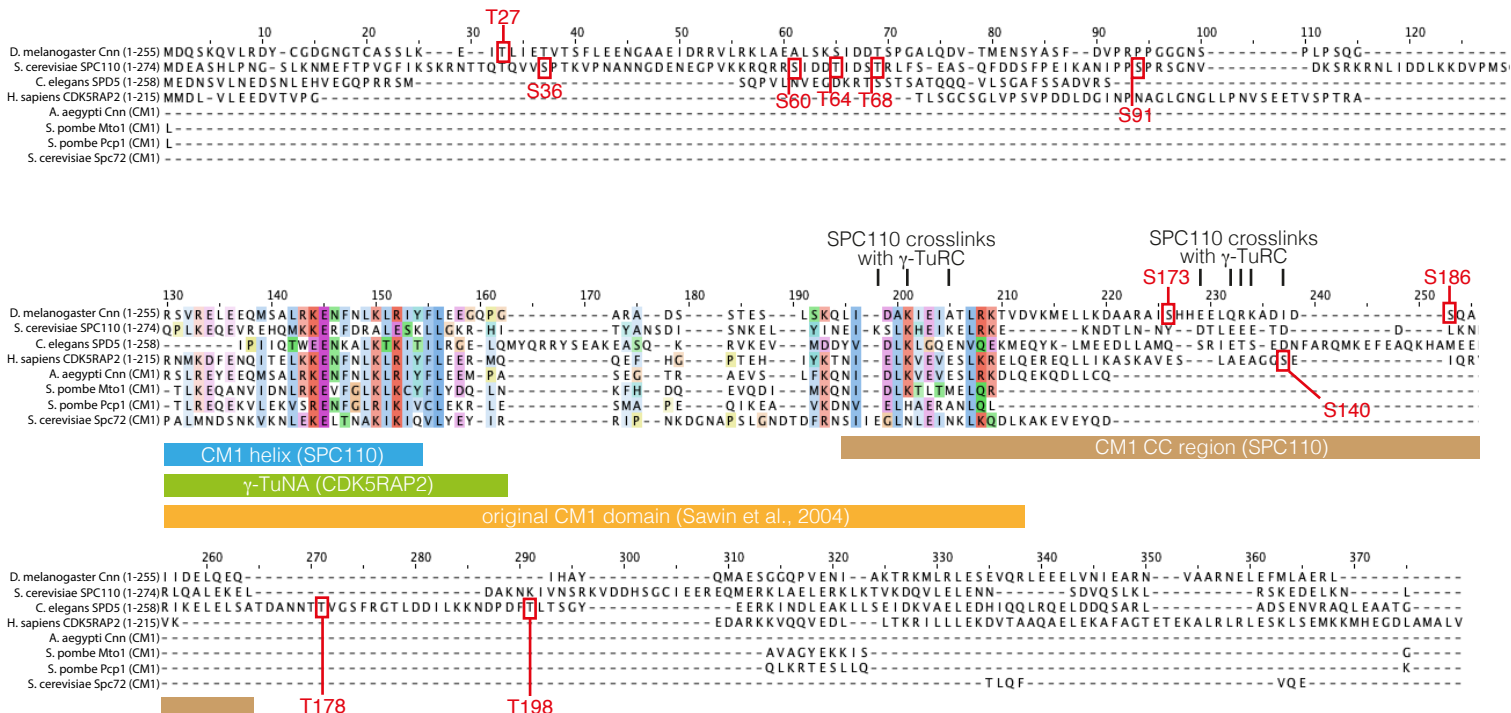

## Figure S4

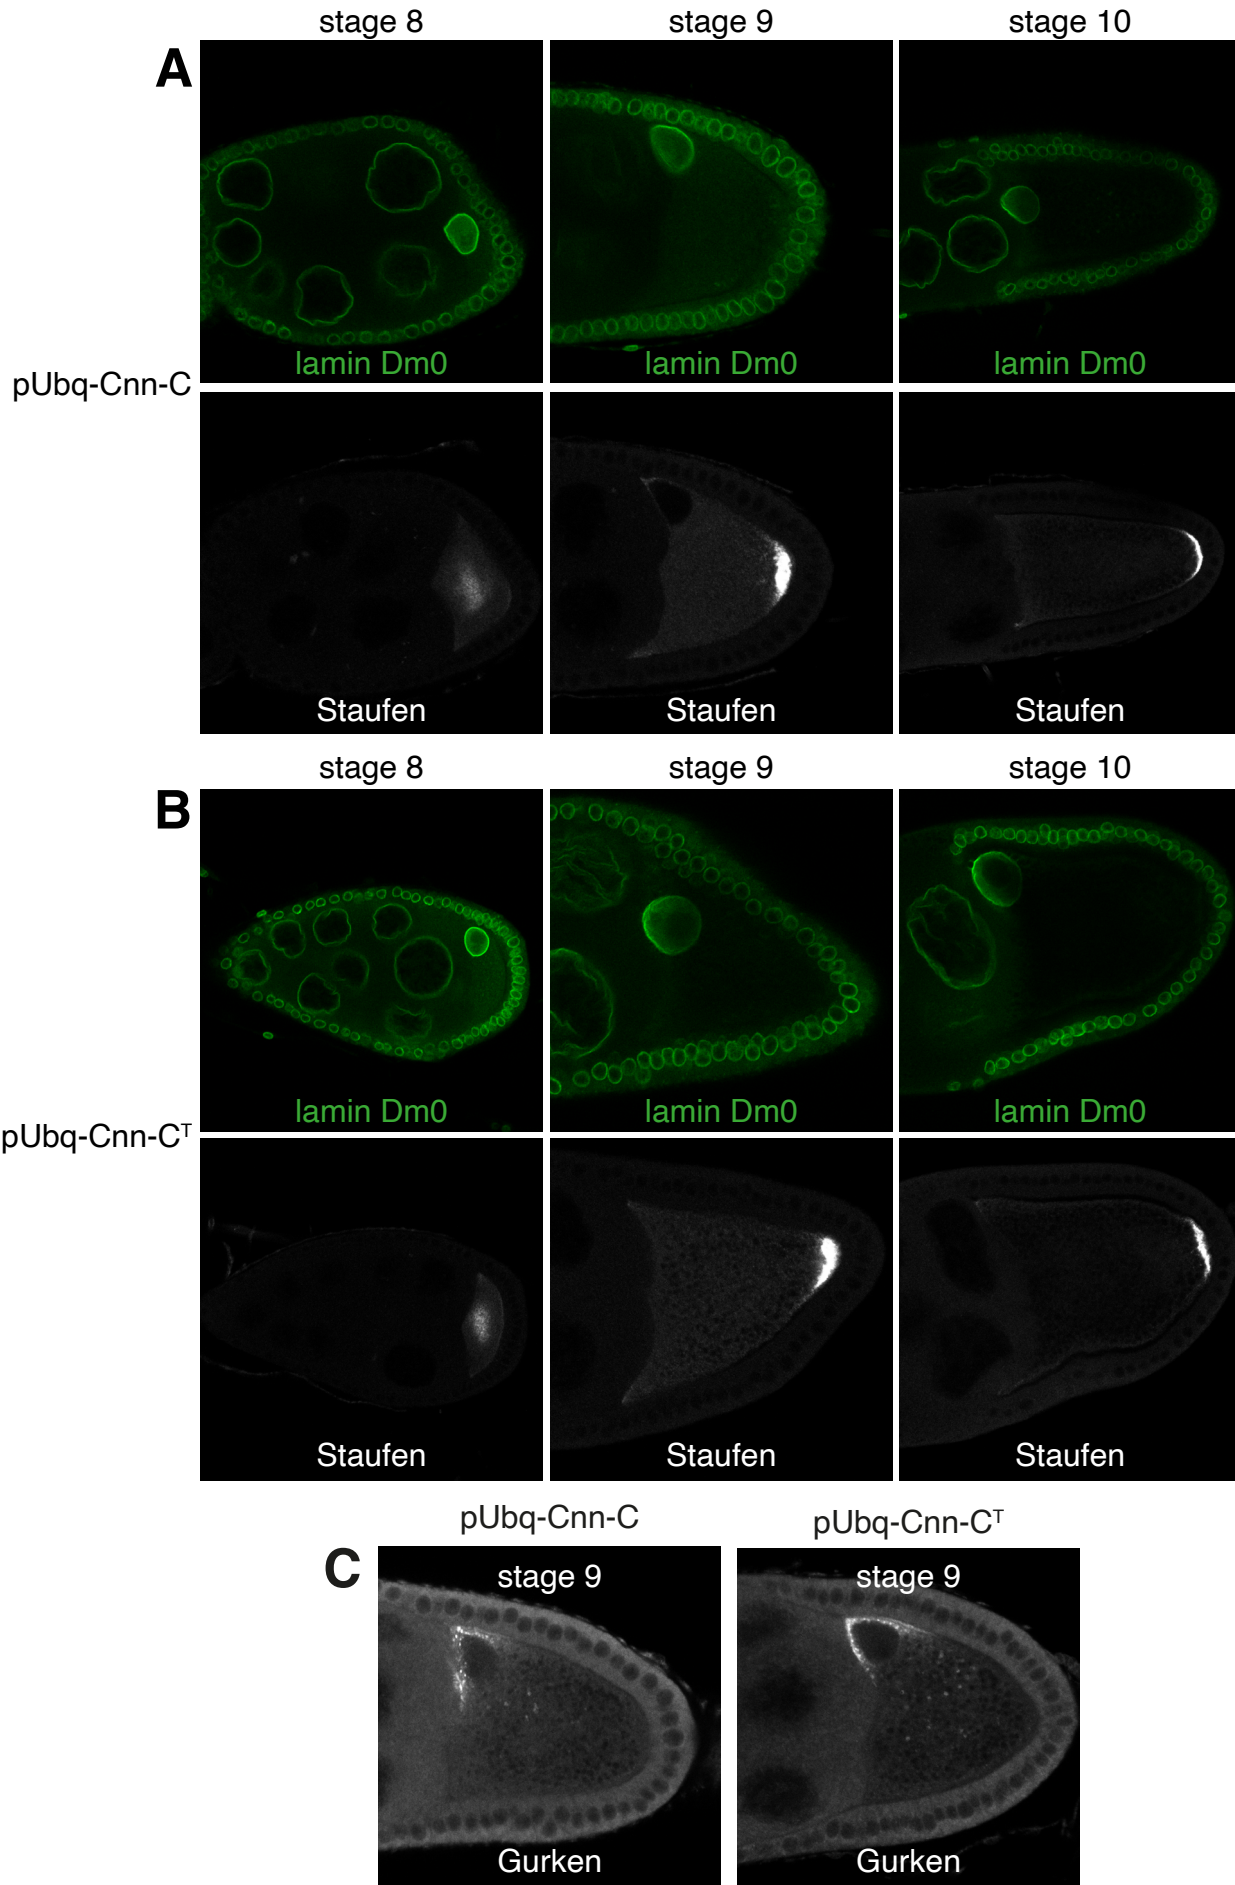



## Figure S5

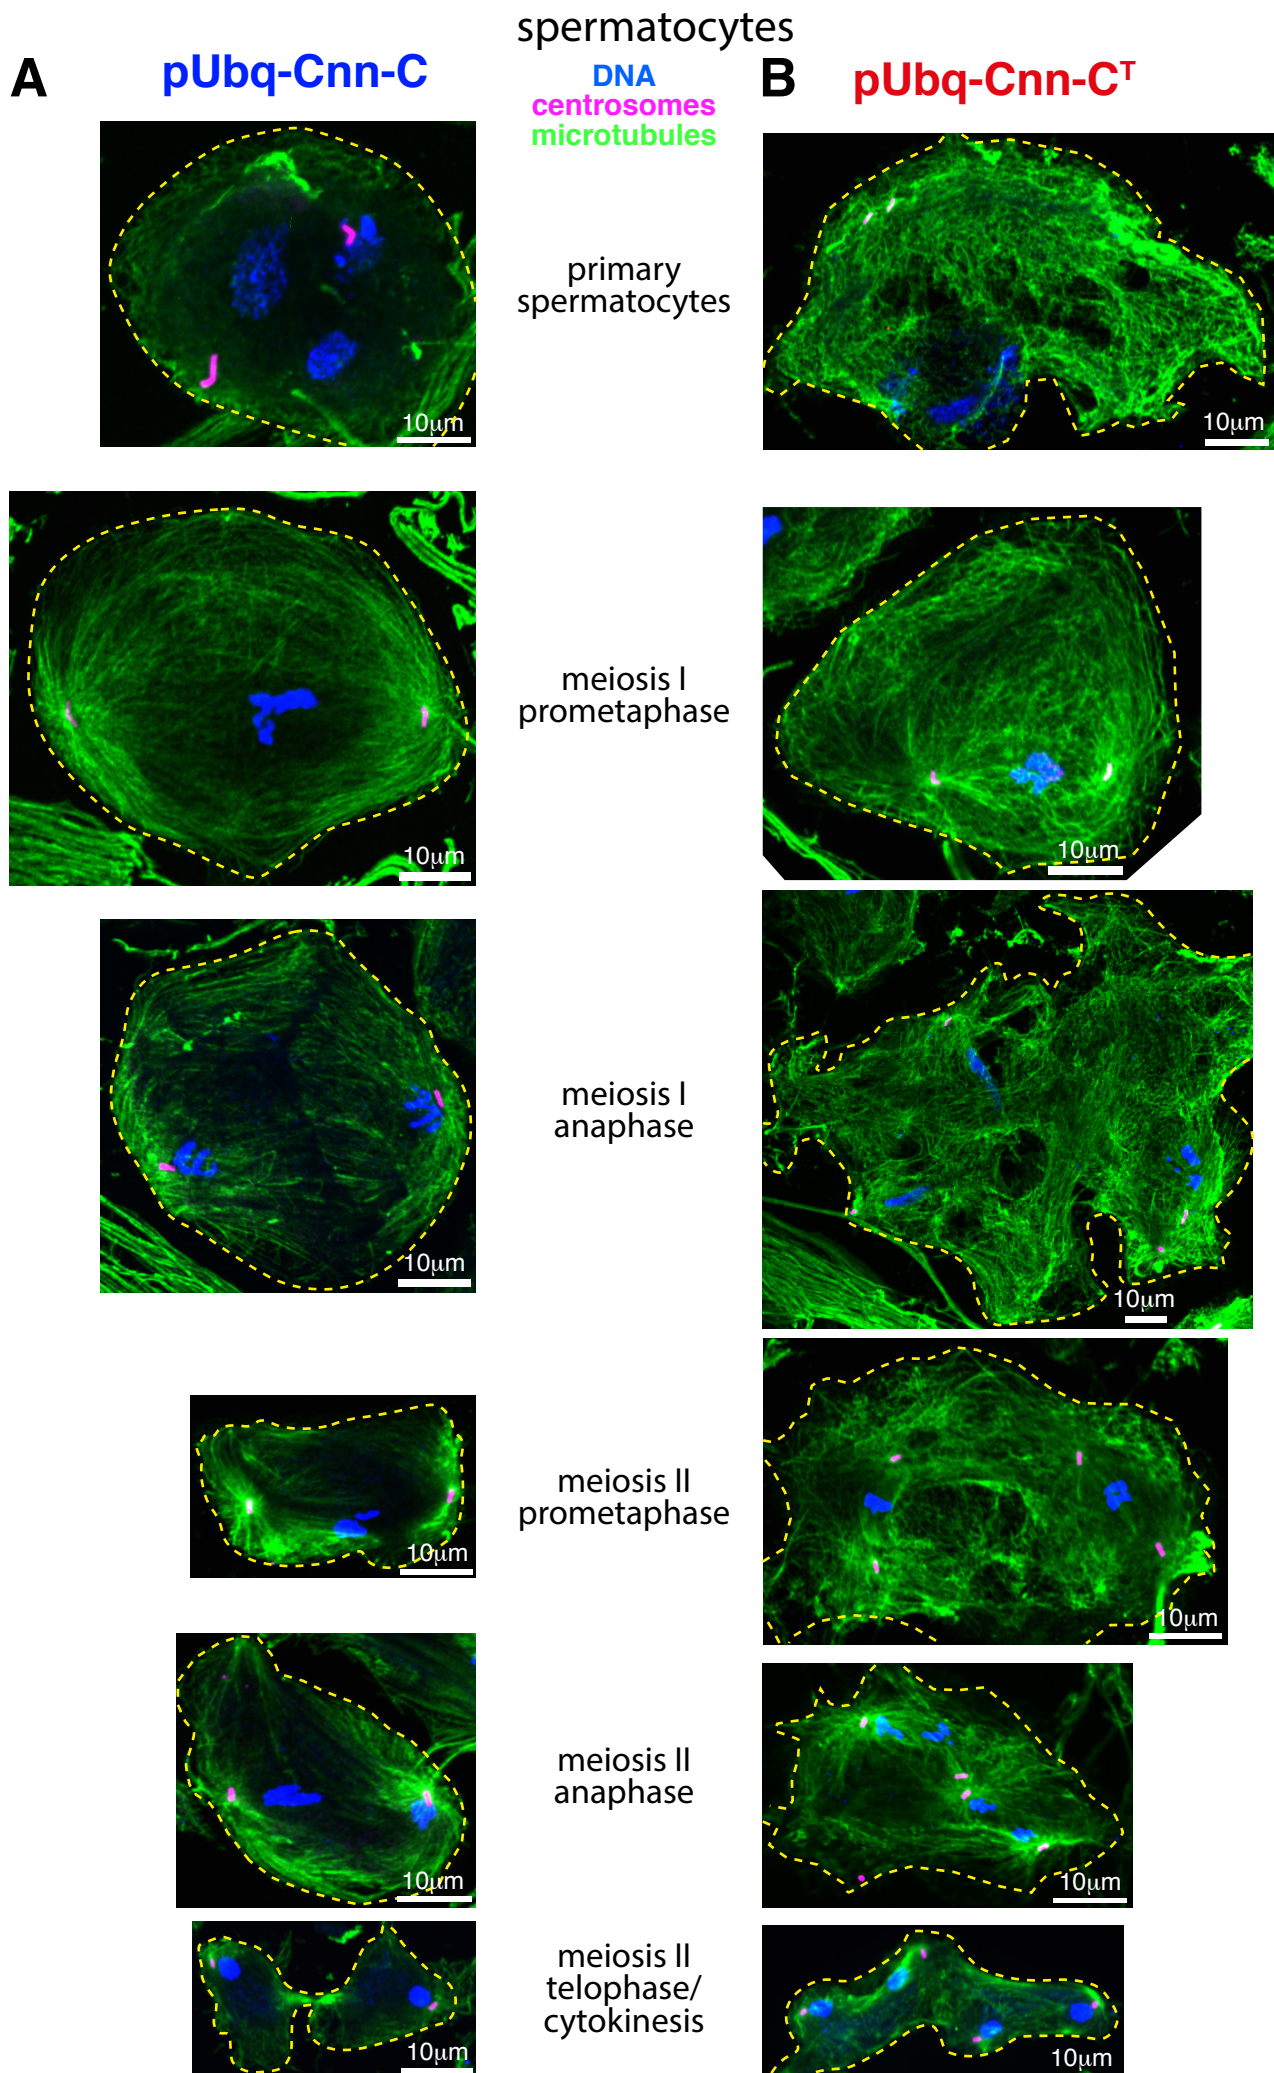

Source: https://www.biorxiv.org/content/10.1101/2020.10.05.326587v2.full.pdf
